# Supplementary material for: Abdominal aortic calcification, bone mineral density and fractures: a systematic review and meta-analysis protocol
Source: PubMed Central journal article supplement — BMJ Open. 2019 Apr 2;9(4):e026232. doi: 10.1136/bmjopen-2018-026232 (PMC6500258; doi:10.1136/bmjopen-2018-026232), 2019-04-02
Supplement: bmjopen-2018-026232.draft_revisions.pdf [file bmjopen-2018-026232.draft_revisions.pdf]

# BMJ Open

BMJ Open is committed to open peer review. As part of this commitment we make the peer review history of every article we publish publicly available.

When an article is published we post the peer reviewers' comments and the authors' responses online. We also post the versions of the paper that were used during peer review. These are the versions that the peer review comments apply to.

The versions of the paper that follow are the versions that were submitted during the peer review process. They are not the versions of record or the final published versions. They should not be cited or distributed as the published version of this manuscript.

BMJ Open is an open access journal and the full, final, typeset and author-corrected version of record of the manuscript is available on our site with no access controls, subscription charges or pay-per-view fees (<http://bmjopen.bmj.com>).

If you have any questions on BMJ Open's open peer review process please email [editorial.bmjopen@bmj.com](mailto:editorial.bmjopen@bmj.com)

# BMJ Open

## Abdominal aortic calcification, bone mineral density and fractures: a systematic review and meta-analysis protocol

|                               |                                                                                                                                                                                                                                                                                                                                                                                                                                                                                                                                                                                                                                                                                                                                                                                                                                                                                                                                                                                                                                                                                                                                                                                                                                                                                                                                                                                                                                                                                                                                                                                                                                    |
|-------------------------------|------------------------------------------------------------------------------------------------------------------------------------------------------------------------------------------------------------------------------------------------------------------------------------------------------------------------------------------------------------------------------------------------------------------------------------------------------------------------------------------------------------------------------------------------------------------------------------------------------------------------------------------------------------------------------------------------------------------------------------------------------------------------------------------------------------------------------------------------------------------------------------------------------------------------------------------------------------------------------------------------------------------------------------------------------------------------------------------------------------------------------------------------------------------------------------------------------------------------------------------------------------------------------------------------------------------------------------------------------------------------------------------------------------------------------------------------------------------------------------------------------------------------------------------------------------------------------------------------------------------------------------|
| Journal:                      | <i>BMJ Open</i>                                                                                                                                                                                                                                                                                                                                                                                                                                                                                                                                                                                                                                                                                                                                                                                                                                                                                                                                                                                                                                                                                                                                                                                                                                                                                                                                                                                                                                                                                                                                                                                                                    |
| Manuscript ID                 | bmjopen-2018-026232                                                                                                                                                                                                                                                                                                                                                                                                                                                                                                                                                                                                                                                                                                                                                                                                                                                                                                                                                                                                                                                                                                                                                                                                                                                                                                                                                                                                                                                                                                                                                                                                                |
| Article Type:                 | Protocol                                                                                                                                                                                                                                                                                                                                                                                                                                                                                                                                                                                                                                                                                                                                                                                                                                                                                                                                                                                                                                                                                                                                                                                                                                                                                                                                                                                                                                                                                                                                                                                                                           |
| Date Submitted by the Author: | 23-Aug-2018                                                                                                                                                                                                                                                                                                                                                                                                                                                                                                                                                                                                                                                                                                                                                                                                                                                                                                                                                                                                                                                                                                                                                                                                                                                                                                                                                                                                                                                                                                                                                                                                                        |
| Complete List of Authors:     | Rodriguez, Alex; Bone and Muscle Health Research Group, School of Clinical Sciences at Monash Health, Monash Medical Centre<br>Leow, Kevin; The University of Sydney, Centre for Kidney Research, School of Public Health, Sydney Medical School, Children's Hospital at Westmead<br>Szulc, Pawel; INSERM UMR 1033, University of Lyon, Hospices Civils de Lyon<br>Scott, David ; Bone and Muscle Health Research Group, School of Clinical Sciences at Monash Health, Monash Medical Centre<br>Ebeling, Peter; Bone and Muscle Health Research Group, School of Clinical Sciences at Monash Health, Monash Medical Centre<br>Sim, Marc; Edith Cowan University, School of Medical and Health Sciences; The University of Western Australia, Medical School, Royal Perth Hospital Unit<br>Wong, Germaine; The Children's Hospital at Westmead, Centre for Kidney Research<br>Lim, Wai H.; Sir Charles Gairdner Hospital, Department of Renal Medicine; University of Western Australia,<br>Schousboe, John; Park Nicollet Osteoporosis Center and HealthPartners Institute, Minneapolis, MN, USA; and Division of Health Policy and Management, University of Minnesota<br>Kiel, Douglas; Institute for Aging Research, Hebrew Senior Life, Beth Israel Deaconess Medical Center, Harvard Medical School<br>Prince, Richard ; Medical School, The University of Western Australia; Department of Endocrinology and Diabetes, Sir Charles Gairdner Hospital<br>Lewis, Joshua; School of Medical and Health Sciences, Edith Cowan University; Children's Hospital at Westmead Centre for Kidney Research, Centre for Kidney Research |
| Keywords:                     | vascular calcification, bone mineral density, fracture, abdominal aorta, vascular disease                                                                                                                                                                                                                                                                                                                                                                                                                                                                                                                                                                                                                                                                                                                                                                                                                                                                                                                                                                                                                                                                                                                                                                                                                                                                                                                                                                                                                                                                                                                                          |
|                               |                                                                                                                                                                                                                                                                                                                                                                                                                                                                                                                                                                                                                                                                                                                                                                                                                                                                                                                                                                                                                                                                                                                                                                                                                                                                                                                                                                                                                                                                                                                                                                                                                                    |

SCHOLARONE™  
Manuscripts

1  
2  
3 **Abdominal aortic calcification, bone mineral density and fractures:**  
4  
5 **a systematic review and meta-analysis protocol**  
6  
7  
8

9 Alexander Rodriguez<sup>1</sup>, Kevin Leow<sup>2</sup>, Pawel Szulc<sup>3</sup>, David Scott<sup>1</sup>, Peter Ebeling<sup>1</sup>, Marc  
10 Sim<sup>4,5</sup>, Germaine Wong<sup>2</sup>, Wai H. Lim<sup>5,6</sup>, John T. Schousboe<sup>7</sup>, Douglas P. Kiel<sup>8</sup>, Richard L.  
11 Prince<sup>5,9</sup>, and Joshua R. Lewis<sup>2,4,5</sup>  
12  
13  
14  
15

16  
17  
18  
19 **Affiliations**

20  
21 <sup>1</sup> Bone and Muscle Health Research Group, School of Clinical Sciences at Monash Health,  
22 Monash Medical Centre, Victoria, Australia;

23  
24  
25 <sup>2</sup> The University of Sydney, Centre for Kidney Research, School of Public Health, Sydney  
26 Medical School, Children's Hospital at Westmead, New South Wales, Australia;

27  
28  
29  
30 <sup>3</sup> INSERM UMR 1033, University of Lyon, Hospices Civils de Lyon, Lyon, France;

31  
32  
33 <sup>4</sup> School of Medical and Health Sciences, Edith Cowan University, Joondalup, Australia;

34  
35  
36 <sup>5</sup> Medical School, University of Western Australia, Perth, Australia;

37  
38  
39 <sup>6</sup> Department of Renal Medicine, Sir Charles Gairdner Hospital, Perth, Australia;

40  
41 <sup>7</sup> Park Nicollet Osteoporosis Center and HealthPartners Institute, Minneapolis, MN, USA and  
42 Division of Health Policy and Management, University of Minnesota, Minneapolis, MN,  
43 USA;  
44  
45

46  
47  
48 <sup>8</sup> Institute for Aging Research, Hebrew Senior Life, Beth Israel Deaconess Medical Center,  
49 Harvard Medical School, Boston, MA, USA;

50  
51  
52 <sup>9</sup> Department of Endocrinology and Diabetes, Sir Charles Gairdner Hospital, Perth Australia;  
53  
54  
55  
56  
57  
58

**Corresponding author:**

Dr Joshua Lewis

Tel: +61 8 6304 4602

Edith Cowan University

E-mail: [joshua.lewis@ecu.edu.au](mailto:joshua.lewis@ecu.edu.au)

School of Medical and Health Sciences

270 Joondalup drive, Joondalup, WA, 6027, AUSTRALIA

**Word count:** 2004

For peer review only

## Abstract

**Introduction:** Abdominal aortic calcification (AAC) is associated with low bone mass and increased fracture risk. Two previous meta-analyses have investigated the association between AAC and fracture. However, these meta-analyses undertook limited searches and did not explore potential sources of between-study heterogeneity. Our aim is to undertake a sensitive and comprehensive assessment of the relationship between AAC, bone mineral density (BMD) as well as prevalent and incident fractures.

**Methods:** We will search MEDLINE, EMBASE, Web of Science core collection, and Google scholar (top 200 articles sorted by relevance) from their inception until 1st June 2018. Reference lists of included studies and previous systematic reviews will be hand searched for additional eligible studies. Retrospective and prospective cohort studies (cross-sectional, case-control and longitudinal) reporting the association between AAC, BMD and fracture at any site will be included. At least two investigators will independently: (A) evaluate study eligibility and extract data, with a third investigator to adjudicate when discrepancies occur, (B) assess study quality by the Newcastle-Ottawa Scale for each cohort/study. The meta-analysis will be reported in adherence to the Meta-analysis of Observational Studies in Epidemiology (MOOSE) criteria. AAC will be grouped as either: (1) AAC present or absent, (2) AAC categorised as “low” (referent – lowest reported group) vs. “high” (all other groups) or (3) dose-response when AAC was assessed in three or more groups. Where primary event data was reported in individual studies, pooled risk differences and risk ratios with 95%CI will be calculated, from which, a summary estimate will be determined using DerSimonian-Laird random effects models. For the AAC and BMD pooled analyses estimates will be expressed as standardised mean difference with 95%CI. We will examine the likelihood of publication bias and where possible, investigate potential reasons for between-study heterogeneity using subgroup analyses and meta-regression.

1  
2  
3 **Prospero registration number:** CRD42018088019  
4

5 **Key words:** vascular calcification, bone mineral density, fracture, abdominal aorta, vascular  
6  
7 disease  
8  
9

10  
11 **Article summary: strengths and limitations**  
12

- 13  
14 • Previous meta-analyses have not utilised comprehensive search strategies and have found  
15 moderate to high amounts of heterogeneity, which for the most part has been unexplained.  
16 The planned comprehensive meta-analysis is warranted and will help address uncertainties  
17 regarding the measurement of AAC for the prediction of fracture outcomes. Additionally,  
18 this study will use meta-regression to identify sources of heterogeneity and identify  
19 subgroups or subpopulations where AAC is more or less predictive of poorer outcomes.  
20  
21 • To our knowledge there has been no systematic review and meta-analysis that has  
22 investigated the association between AAC and BMD, which is along the hypothesised  
23 causal pathway to fracture.  
24  
25 • The main limitation of this review is that causality cannot be established due to the  
26 observational nature of the studies.  
27  
28 • A further limitation is the differences in imaging modality, measurement and reporting of  
29 AAC.  
30  
31  
32  
33  
34  
35  
36  
37  
38  
39  
40  
41  
42  
43  
44  
45  
46  
47  
48  
49  
50  
51  
52  
53  
54  
55  
56  
57  
58  
59  
60

## Introduction

Vascular and bone diseases are both chronic age-related disease that share many common dietary and lifestyle risk factors and cause considerable morbidity and mortality <sup>1</sup>. Atherosclerotic lesions in the abdominal aorta generally begin around the major vessel bifurcations and branching arteries such as the inferior mesenteric artery and the lumbar arteries that supply blood and nutrients to the lumbar vertebrae. <sup>2</sup> Occlusion of these vessels may causes ischemia in the lumbar spine and may result in disc degeneration and asymptomatic vertebral fractures. <sup>3</sup> Additionally the underlying processes regulating arterial calcification share many similarities to bone physiology <sup>4</sup> and calcified atherosclerotic plaques release both local and systemic osteochondrogenic factors that may affect regional and systemic bone homeostasis. <sup>5</sup> Conversely circulating levels of factors regulating bone homeostasis may also regulate vascular calcifications <sup>6</sup> with a number of studies demonstrating osteoporosis and bone mineral density being a risk factor for CVD disease. <sup>7,8</sup>

Assessment of lateral spine images are often undertaken to detect prevalent vertebral fractures and have been shown to improve fracture prediction. <sup>9-11</sup> These images can also be used to assess the degree of abdominal aortic calcification (AAC). To date there are conflicting findings as to whether AAC is associated with bone mineral density and fractures and whether or not these associations are due to ageing, shared fracture risk factors or are a non-traditional independent fracture risk factor. Recent meta-analyses published in 2016 <sup>12</sup> and 2017 <sup>13</sup>, looking at observational studies, showed that people with any or high AAC were at greater risk of fractures than those with no or low AAC. However, the previous studies did not systematically review and search the literature (searches found 91 and 105 articles respectively) and the meta-analyses missed many of the known studies. Furthermore studies identified moderate-high heterogeneity without properly exploring or explaining the cause. As such uncertainty exists as to the importance of identifying AAC for predicting incident

fractures. We will therefore undertake a meta-analysis of studies reporting on AAC, bone mineral density (BMD) at any site and prevalent and incident fractures at any site.

## Objectives

1. To determine the association between AAC with BMD at any site.
2. To determine the association between AAC with prevalent fractures (cross-sectional) by reported prevalent fracture sites.
3. To determine the association between AAC with incident fractures by reported incident fracture sites.
4. To assess the impact of potential effect modifiers on previous published findings.

## Methods and Analysis

The systematic review and meta-analysis has been registered with PROSPERO (CRD42018088019) and reported in adherence to the Meta-analysis of Observational Studies in Epidemiology (MOOSE) reporting criteria<sup>14</sup>.

## Patient and public involvement statement

There is no patient or public involved in this systematic review/meta-analysis.

## Eligibility criteria for studies included in this review

### *Criteria for considering studies for review*

- a) Observational studies in humans. These include cohort (both retrospective and prospective cohort studies), case control and cross-sectional studies that report eligible exposure(s) and outcome(s)
- b) Abdominal aortic calcification assessed by any methodology.
- c) Report any bone mineral density measure or prevalent or incident fracture outcome.

### *Exclusion criteria*

- a) Reviews of existing literature.



## Exposure

AAC identified from either radiography, DXA machine or CT. AAC will be presented as;

**a)** AAC present or absent or

**b)** AAC categorized as low (referent – lowest reported group) vs. moderate to high (all other reported groups).

**c)** AAC dose-response when AAC was assessed in three or more groups categorised as low (lowest reported category), moderate (middle reported category[ies]) and high (highest reported category).

## Outcomes

1. Bone mineral density (by site).
2. Prevalent fractures (by fracture site).
3. Incident fractures (by fracture site).

## Cohort characteristics for meta-regression (where available)

- Cohort age (cohort mean)
- Gender (% female)
- Years since menopause (cohort mean)
- Hormone replacement therapy (%)
- Modality of assessing AAC (DXA, standard radiograph or CT).
- Cut points chosen for comparison (low vs high, tertiles etc.)
- Diabetes (% of cohort)
- Current smoker (% of cohort)
- History of smoking (% of cohort)
- Body mass index (cohort mean)
- Chronic kidney disease (% of cohort)

- History of CVD (% of cohort)
- Location of study (Europe, Asia-Pacific, North America), i.e. are association consistent across ethnicities and nation wealth
- Prevalence of CVD medication use (% of cohort)
- History of fracture (% of cohort)

## **Study Design**

### **Search strategies**

A comprehensive literature search within MEDLINE, Web of Science core collection and EMBASE databases will be conducted to source all possibly relevant studies for review, without language restriction. Google scholar will be searched for the top 200 articles sorted by relevance. The search terms will be combined with the boolean “AND” to find all potentially relevant studies. Conference proceedings and abstracts will also be evaluated. A hand search of reference lists of eligible studies and previous meta-analyses will also be undertaken. Non-English papers will be translated and evaluated for eligibility. If more than one publication of a study is retrieved, articles with the most up to date and complete information will be included, although additional unique data from all sources will be considered and included when relevant. Examples of the search strategy are shown in **Table 1**.

### **Process for selecting studies**

Two or more independent authors [A.J.R., K.L., M.S. and J.R.L.] will assess retrieved citations to assess studies for eligibility. Briefly the process for selecting studies for inclusion in the review and meta-analysis will be as follows: merge all identified records using EndNote; remove duplicate records of the same report; retrieve full text of the potentially relevant reports; link together multiple reports of the same study (using the first or largest report as the primary record and subsequent reports to supplement other data); examine full-

1  
2  
3 text reports for compliance with eligibility criteria; correspond with investigators, where  
4 appropriate, to clarify study eligibility and request missing data; make final decisions on  
5 study inclusion. Discrepancies about inclusion will be resolved via iteration and consensus or  
6 a third reviewer if consensus cannot be reached between the two reviewers. Excluded studies  
7 identified that may plausibly be expected to be an included will be reported in supplementary  
8 data with a detailed explanation for the reason of exclusion.  
9  
10  
11  
12  
13  
14

### 15 16 **Risk of bias and quality assessment**

17  
18 The risk of bias for observational studies will be assessed using the Newcastle-Ottawa Scale (NOS).  
19 An example of this scale is provided in Supplementary Material 1A, 1B, 1C, 1D. In addition  
20 publication bias will be assessed by visual inspection of a funnel plots and the Egger's and Begg's  
21 regression tests. Summary estimates of the confidence placed on the evidence will be evaluated using  
22 the Grading of Recommendations Assessment Development and Evaluation (GRADE) of evidence  
23 about prognosis. GRADE for evidence about prognosis starts with high quality evidence that can then  
24 be rated down. These criteria are based on; a) 5 domains diminishing confidence (-1 for risk of bias,  
25 inconsistency, imprecision, indirectness, and publication bias) and b) 2 situations increasing  
26 confidence (+1 or +2 for large-very large effect size and a +1 for a dose-response gradient [increasing  
27 pooled relative risks for fractures with increasing severity of AAC]).<sup>15</sup>  
28  
29  
30  
31  
32  
33  
34  
35  
36  
37  
38

### 39 **Statistical analysis and data synthesis**

40  
41 Analysis of outcome variables will be presented according to either: (1) AAC present or  
42 absent (2) AAC categorised as “low” (referent – lowest reported group) vs. “high” (all other  
43 groups) or (3) dose response when AAC was assessed in three or more groups. For the dose-  
44 response analysis the lowest reported group (low AAC group) will be compared to the middle  
45 group(s) vs the highest reported AAC group (high AAC). Where data on more than three  
46 groups of AAC were presented the middle groups were combined as “moderate AAC”. This  
47 approach was selected due to many studies reporting on variable number of AAC groups with  
48  
49  
50  
51  
52  
53  
54  
55  
56  
57  
58  
59  
60

1  
2  
3 the majority of studies using different cut-points for these groupings. Data on the severity of  
4 AAC quantification presented as a continuous measure or in three or more groupings of AAC  
5 will be used to determine the impact of increased abdominal aortic calcium load on  
6 outcomes. Where primary event data was reported in individual studies, pooled risk  
7 differences and risk ratios (RR) with 95% confidence intervals will be calculated, from  
8 which, a summary estimate was determined using DerSimonian-Laird random effects models.  
9 For the AAC and BMD pooled analyses estimates will be expressed as standardised mean  
10 difference (SMD) with 95% CI. Values will be considered significant if the 95%CI of the  
11 point estimate does not cross unity. Between-study heterogeneity will also investigated by  
12 using subgroup analyses and the  $I^2$  statistic by study ID which quantifies inconsistency across  
13 studies to assess the impact of heterogeneity on the meta-analysis.<sup>16 17</sup> We will evaluate for  
14 heterogeneity using the  $I^2$  statistic and considered the  $I^2$  thresholds of <25%, 25-49%, 50-  
15 75% and >75% to represent low, moderate, high and very-high heterogeneity.  
16  
17  
18  
19  
20  
21  
22  
23  
24  
25  
26  
27  
28  
29  
30

### 31 **Subgroup analysis and investigation of heterogeneity**

32 We will perform meta-regression of cohort characteristics to identify factors potentially  
33 explaining heterogeneity as well as performing subgroup analyses. P values of <0.01 will be  
34 considered statistically significant for subgroup analyses. Pre-planned subgroup analyses to  
35 explore statistical heterogeneity will include stratification by:  
36  
37  
38  
39  
40  
41

- 42 1. Subgroups based on clinical heterogeneity e.g. disease populations (general  
43 population, diabetics, chronic kidney disease, other) and age groups (<60 years, 60-69  
44 years and  $\geq 70$  years).
  - 45 2. Methodological heterogeneity e.g. AAC assessment methods (Radiography, Dual X-  
46 ray absorptiometry or CT), fracture reporting and validation.
  - 47 3. Statistical heterogeneity e.g. cohort characteristics (mean ages of the cohorts)
- 48  
49  
50  
51  
52  
53  
54  
55  
56  
57  
58  
59  
60

### Further analyses

Where data on the severity of AAC quantification is presented as a continuous measure or in tertile/categories these data will be used to determine the impact of increased abdominal aortic calcium load on prognosis. \*Where AAC is not scored using the AAC24 scale equivalent values will be relative to estimated vertebral heights from similar aged populations. Where AAC is assessed by CT the categorical low vs moderate and high AAC will be used.

### Sensitivity analysis

We will carry out sensitivity analyses for:

1. Large studies alone to establish how much they dominate the results (n > 500 participants).
2. Methodology - we will assess the methodological quality of studies using the Newcastle-Ottawa Scale (NOS) for assessing the quality of nonrandomised studies in meta-analyses (Supplementary Material 1). For the purpose of this sensitivity analysis we will use 3 categories of quality (Good, Fair, or Poor).
3. Studies conducted in individuals without a history of a prior fracture (as this is the biggest risk factor for a new fracture).
4. Studies conducted in high income vs. low income countries.
5. Studies that included non-osteoporotic fractures (fractures of the toes, fingers, face and skull fractures)

### Concluding statement

Previous meta-analyses on this topic have a number of important limitations. By undertaking the pre-planned comprehensive review and meta-analysis, we will gain better understanding of the relationship between abdominal aortic calcification (AAC), bone mineral density and

1  
2  
3 increased fracture risk. The review will provide impetus for further research, diagnosis and  
4 treatment of this novel fracture risk factor. This review will also evaluate the quality of the  
5 published evidence and our confidence in the estimates for the meta-analysis, while  
6 identifying important knowledge gaps, potential sources of between-study heterogeneity and  
7 issues with imaging, assessing or reporting of AAC in published studies.  
8  
9  
10  
11  
12

13 **Ethics and dissemination:** The systematic review and meta-analysis does not require ethical  
14 approval. The study will be submitted to a peer reviewed journal and disseminated via  
15 research presentations.  
16  
17  
18

#### 19 **Data statement**

20 Technical appendix and dataset will be available on request from the corresponding author  
21 (J.R.L).  
22  
23  
24  
25  
26

#### 27 **Conflicts of interest**

28 The authors declare that there is no conflict of interests in this study protocol.  
29

#### 30 **Funding and acknowledgements**

31 The salaries of J.R.L. and D.S. are supported by a National Health and Medical Research  
32 Council of Australia (NHMRC) Career Development Fellowship (ID: 1107474 and 1123014,  
33 respectively). Funding agencies had no input into any aspect of the design and management  
34 of this study.  
35  
36  
37  
38  
39  
40

#### 41 **Author contribution**

42 All authors contributed to the study concept and design. A.R. and K.L. led the writing of the  
43 manuscript and is the primary designer of the protocol under the guidance of J.R.L, J.T.S and  
44 P.S and all-authors conceived the conceptual ideas presented in the revised protocol critically.  
45 All authors read and approved the revised version and final supported versions. J.R.L has the  
46 primary responsibility for the final content.  
47  
48  
49  
50  
51  
52  
53  
54  
55  
56  
57  
58  
59  
60

## References

1. Farhat GN, Cauley JA. The link between osteoporosis and cardiovascular disease. *Clin Cases Miner Bone Metab* 2008;5(1):19-34.
2. Lillemark L, Ganz M, Barascuk N, et al. Growth patterns of abdominal atherosclerotic calcified deposits from lumbar lateral X-rays. *Int J Cardiovasc Imaging* 2010;26(7):751-61. doi: 10.1007/s10554-010-9606-3
3. Kauppila LI, Mikkonen R, Mankinen P, et al. MR aortography and serum cholesterol levels in patients with long-term nonspecific lower back pain. *Spine* 2004;29(19):2147-52.
4. Thompson B, Towler DA. Arterial calcification and bone physiology: role of the bone-vascular axis. *Nat Rev Endocrinol* 2012;8(9):529-43. doi: 10.1038/nrendo.2012.36 [published Online First: 2012/04/05]
5. Szulc P. Abdominal aortic calcification: A reappraisal of epidemiological and pathophysiological data. *Bone* 2016;84:25-37. doi: 10.1016/j.bone.2015.12.004
6. Touw WA, Ueland, T., Bollerslev, J., Schousboe, J.T., Lim, W.H., Wong, G, Thompson, P.L., Kiel, D.P., Prince, R.L., Rivadeneira, F., Lewis, J.R. Association of Circulating Wnt Antagonists With Severe Abdominal Aortic Calcification in Elderly Women. *The J Endocrine Soc* 2017;1(1):26-38. doi: 10.1210/js.2016-1040
7. Warburton DE, Nicol CW, Gatto SN, et al. Cardiovascular disease and osteoporosis: balancing risk management. *Vasc Health Risk Manag* 2007;3(5):673-89. [published Online First: 2007/12/15]

- 1  
2  
3  
4  
5 8. Tanko LB, Christiansen C, Cox DA, et al. Relationship between osteoporosis and  
6  
7 cardiovascular disease in postmenopausal women. *J Bone Min Res* 2005;20(11):1912-  
8  
9 20. doi: 10.1359/JBMR.050711 [published Online First: 2005/10/20]  
10  
11 9. Ferrar L, Roux C, Felsenberg D, et al. Association between incident and baseline vertebral  
12  
13 fractures in European women: vertebral fracture assessment in the Osteoporosis and  
14  
15 Ultrasound Study (OPUS). *Osteoporo Int* 2012;23(1):59-65. doi: 10.1007/s00198-  
16  
17 011-1701-3  
18  
19 10. Black DM, Arden NK, Palermo L, et al. Prevalent vertebral deformities predict hip  
20  
21 fractures and new vertebral deformities but not wrist fractures. Study of Osteoporotic  
22  
23 Fractures Research Group. *J Bone Min Res* 1999;14(5):821-8. doi:  
24  
25 10.1359/jbmr.1999.14.5.821  
26  
27  
28 11. Ross PD, Genant HK, Davis JW, et al. Predicting vertebral fracture incidence from  
29  
30 prevalent fractures and bone density among non-black, osteoporotic women.  
31  
32 *Osteoporo Int* 1993;3(3):120-6.  
33  
34 12. Chen Z, Yu Y. Aortic calcification was associated with risk of fractures: A meta-analysis.  
35  
36 *J Back Musculoskeletal Rehab* 2016;29(4):635-42.  
37  
38 13. Wei D, Zheng G, Gao Y, et al. Abdominal aortic calcification and the risk of bone  
39  
40 fractures: a meta-analysis of prospective cohort studies. *J Bone Miner Metab* 2017  
41  
42 doi: 10.1007/s00774-017-0849-0  
43  
44  
45 14. Stroup DF, Berlin JA, Morton SC, et al. Meta-analysis of observational studies in  
46  
47 epidemiology: a proposal for reporting. Meta-analysis Of Observational Studies in  
48  
49 Epidemiology (MOOSE) group. *JAMA* 2000;283(15):2008-12. [published Online  
50  
51 First: 2000/05/02]  
52  
53  
54  
55  
56  
57  
58  
59  
60



- 1  
2  
3 15. Iorio A, Spencer FA, Falavigna M, et al. Use of GRADE for assessment of evidence  
4  
5 about prognosis: rating confidence in estimates of event rates in broad categories of  
6  
7 patients. *BMJ* 2015;350:h870. doi: 10.1136/bmj.h870  
8  
9 16. Higgins JP, Thompson SG. Quantifying heterogeneity in a meta-analysis. *Stat Med*  
10  
11 2002;21(11):1539-58. doi: 10.1002/sim.1186 [published Online First: 2002/07/12]  
12  
13 17. Higgins JP, Thompson SG, Deeks JJ, et al. Measuring inconsistency in meta-analyses.  
14  
15 *BMJ* 2003;327(7414):557-60. doi: 10.1136/bmj.327.7414.557 [published Online  
16  
17 First: 2003/09/06]  
18  
19  
20  
21  
22  
23  
24  
25  
26  
27  
28  
29  
30  
31  
32  
33  
34  
35  
36  
37  
38  
39  
40  
41  
42  
43  
44  
45  
46  
47  
48  
49  
50  
51  
52  
53  
54  
55  
56  
57  
58  
59  
60

**Table 1.** Example search strategies

| <b>Keyword</b>                              | <b>MEDLINE</b>                                                                                                                                                                                                                                                                                                                                                                                                                                                                                                        | <b>Embase</b>                                                                                                                                                                                                                                                                                                                                                                                                                                                                                            |
|---------------------------------------------|-----------------------------------------------------------------------------------------------------------------------------------------------------------------------------------------------------------------------------------------------------------------------------------------------------------------------------------------------------------------------------------------------------------------------------------------------------------------------------------------------------------------------|----------------------------------------------------------------------------------------------------------------------------------------------------------------------------------------------------------------------------------------------------------------------------------------------------------------------------------------------------------------------------------------------------------------------------------------------------------------------------------------------------------|
| Population = Adults                         | No search strategy                                                                                                                                                                                                                                                                                                                                                                                                                                                                                                    | No search strategy                                                                                                                                                                                                                                                                                                                                                                                                                                                                                       |
| Intervention/Test =<br>aortic calcification | exp Vascular Calcification/ or<br>exp Calcinosis/ or exp Vascular<br>Diseases/ or arterial<br>calcification.mp or exp<br>Arteriosclerosis/ or exp Arterial<br>Occlusive Diseases/ or exp<br>Aortic Diseases/ or aortic.mp or<br>vascular calcifications.mp. or exp<br>Vascular Calcification/ or<br>calcified atherosclerosis.mp or<br>calcification.mp or calcified<br>atherosclerotic plaque.mp or<br>arterial calcium.mp or aortic<br>calcification.mp or aorta<br>calcification.mp and aort\$.mp<br>and calc\$.mp | vascular calcification.mp. or exp<br>blood vessel calcification/ or<br>artery calcification.mp. or exp<br>artery calcification/ or exp<br>coronary artery disease/ or exp<br>arteriosclerosis/ or calcified<br>atherosclerosis.mp or arterial<br>calcium.mp or calcified<br>atherosclerotic plaque.mp or<br>calcification.mp or aortic<br>calcification.mp or aorta<br>calcification.mp or vascular<br>calcifications.mp or<br>arteriosclerosis.mp or<br>extracoronary.mp and aort\$.mp<br>and calc\$.mp |
| Methodology =<br>observational              | No search strategy                                                                                                                                                                                                                                                                                                                                                                                                                                                                                                    | No search strategy                                                                                                                                                                                                                                                                                                                                                                                                                                                                                       |
| Comparator = None                           | No search strategy                                                                                                                                                                                                                                                                                                                                                                                                                                                                                                    | No search strategy                                                                                                                                                                                                                                                                                                                                                                                                                                                                                       |
| Outcome =                                   | bone mineral density.mp or exp<br>Bone Density/ or Fracture.mp or<br>Fractures.mp                                                                                                                                                                                                                                                                                                                                                                                                                                     | bone mineral density.mp or exp<br>bone density/ or fracture.mp or<br>fractures.mp or exp fracture/                                                                                                                                                                                                                                                                                                                                                                                                       |
| Additional specific<br>filters              | Human                                                                                                                                                                                                                                                                                                                                                                                                                                                                                                                 | Human                                                                                                                                                                                                                                                                                                                                                                                                                                                                                                    |

\*The reference lists of recent literature reviews and guidelines will be hand-searched for possibly relevant studies.

## SUPPLEMENTARY MATERIAL 1A

### NEWCASTLE - OTTAWA QUALITY ASSESSMENT SCALE - CASE CONTROL STUDIES

Note: A study can be awarded a maximum of one star for each numbered item within the Selection and Exposure categories. A maximum of two stars can be given for Comparability.

#### Selection

##### 1) Is the case definition adequate?

- a) yes, with independent validation \*
- b) yes, e.g. record linkage or based on self reports
- c) no description

##### 2) Representativeness of the cases

- a) consecutive or obviously representative series of cases \*
- b) potential for selection biases or not stated

##### 3) Selection of Controls

- a) community controls \*
- b) hospital controls
- c) no description

##### 4) Definition of Controls

- a) no history of disease (endpoint) \*
- b) no description of source

#### Comparability

##### 1) Comparability of cases and controls on the basis of the design or analysis

- a) study controls for fracture risk factors (age) \*
- b) study controls for any additional factor \* (other fracture risk factors)

#### Exposure

##### 1) Ascertainment of exposure

- a) secure record (verified fracture) \*
- b) structured interview where blind to case/control status \*
- c) interview not blinded to case/control status
- d) written self report or medical record only
- e) no description

##### 2) Same method of ascertainment for cases and controls

- a) yes \*
- b) no

1  
2  
3 **3) Non-Response rate**

- 4 a) same rate for both groups \*
- 5
- 6 b) non respondents described
- 7
- 8 c) rate different and no designation
- 9
- 10
- 11
- 12
- 13
- 14
- 15
- 16
- 17
- 18
- 19
- 20
- 21
- 22
- 23
- 24
- 25
- 26
- 27
- 28
- 29
- 30
- 31
- 32
- 33
- 34
- 35
- 36
- 37
- 38
- 39
- 40
- 41
- 42
- 43
- 44
- 45
- 46
- 47
- 48
- 49
- 50
- 51
- 52
- 53
- 54
- 55
- 56
- 57
- 58
- 59
- 60

## **SUPPLEMENTARY MATERIAL 1B**

### **NEWCASTLE - OTTAWA QUALITY ASSESSMENT SCALE - COHORT STUDIES**

Note: A study can be awarded a maximum of one star for each numbered item within the Selection and Outcome categories. A maximum of two stars can be given for Comparability

#### **Selection**

##### **1) Representativeness of the exposed cohort**

- a) truly representative of the average **general population of that age** in the community \*
- b) somewhat representative of the average **general population of that age** in the community \*
- c) selected group of users eg nurses, volunteers
- d) no description of the derivation of the cohort

##### **2) Selection of the non exposed cohort**

- a) drawn from the same community as the exposed cohort \*
- b) drawn from a different source
- c) no description of the derivation of the non exposed cohort

##### **3) Ascertainment of exposure**

- a) secure record (**verified fracture**) \*
- b) structured interview \*
- c) written self report
- d) no description

##### **4) Demonstration that outcome of interest was not present at start of study**

- a) yes \*
- b) no

#### **Comparability**

##### **1) Comparability of cohorts on the basis of the design or analysis**

- a) study controls for **age**\*
- b) study controls for any **additional fracture risk factors**\*

#### **Outcome**

##### **1) Assessment of outcome**

- a) independent blind assessment \*
- b) record linkage \*
- c) self report
- d) no description

1  
2  
3 **2) Was follow-up long enough for outcomes to occur**

4 a) yes (fracture - 1 year) \*

5  
6 b) no

7  
8 **3) Adequacy of follow up of cohorts**

9 a) complete follow up - all subjects accounted for \*

10 b) subjects lost to follow up unlikely to introduce bias - small number lost - <20% lost  
11 to follow up, or description provided of those lost) \*

12  
13  
14 c) follow up rate < 80% (select an adequate %) and no description of those lost

15  
16 d) no statement  
17  
18  
19  
20  
21  
22  
23  
24  
25  
26  
27  
28  
29  
30  
31  
32  
33  
34  
35  
36  
37  
38  
39  
40  
41  
42  
43  
44  
45  
46  
47  
48  
49  
50  
51  
52  
53  
54  
55  
56  
57  
58  
59  
60

## **SUPPLEMENTARY MATERIAL 1C**

### **CODING MANUAL FOR COHORT STUDIES**

#### **Selection**

##### **1) Representativeness of the Exposed Cohort**

Item is assessing the representativeness of exposed individuals in the community, not the representativeness of the sample of women from some general population. For example, subjects derived from groups likely to contain middle class, better educated, health oriented women are likely to be representative of postmenopausal estrogen users while they are not representative of all women (e.g. members of a health maintenance organisation (HMO) will be a representative sample of estrogen users. While the HMO may have an under-representation of ethnic groups, the poor, and poorly educated, these excluded groups are not the predominant users of estrogen).

#### ***Allocation of stars as per rating sheet***

##### **2) Selection of the Non-Exposed Cohort**

Allocation of stars as per rating sheet

##### **3) Ascertainment of Exposure**

Allocation of stars as per rating sheet

##### **4) Demonstration That Outcome of Interest Was Not Present at Start of Study**

In the case of mortality studies, outcome of interest is still the presence of a disease/ incident, rather than death. That is to say that a statement of no history of disease or incident earns a star.

#### **Comparability**

##### **1) Comparability of Cohorts on the Basis of the Design or Analysis**

A maximum of 2 stars can be allotted in this category

Either exposed and non-exposed individuals must be matched in the design and/or confounders must be adjusted for in the analysis. Statements of no differences between groups or that differences were not statistically significant are not sufficient for establishing comparability. Note: If the relative risk for the exposure of interest is adjusted for the confounders listed, then the groups will be considered to be comparable on each variable used in the adjustment.

There may be multiple ratings for this item for different categories of exposure (e.g. ever vs. never, current vs. previous or never)

Age = , Other controlled factors =

## Outcome

### 1) Assessment of Outcome

For some outcomes (e.g. fractured hip), reference to the medical record is sufficient to satisfy the requirement for confirmation of the fracture. This would not be adequate for vertebral fracture outcomes where reference to x-rays would be required.

- a) Independent or blind assessment stated in the paper, or confirmation of the outcome by reference to secure records (x-rays, medical records, etc.)
- b) Record linkage (e.g. identified through ICD codes on database records)
- c) Self-report (i.e. no reference to original medical records or x-rays to confirm the outcome)
- d) No description.

### 2) Was Follow-Up Long Enough for Outcomes to Occur

An acceptable length of time should be decided before quality assessment begins (e.g. 5 yrs. for exposure to breast implants)

### 3) Adequacy of Follow-Up of Cohorts

This item assesses the follow-up of the exposed and non-exposed cohorts to ensure that losses are not related to either the exposure or the outcome.

Allocation of stars as per rating sheet.



## SUPPLEMENTARY MATERIAL 1D

### NEWCASTLE - OTTAWA QUALITY ASSESSMENT SCALE – CROSS-SECTIONAL STUDIES

#### Selection (Maximum 5 stars)

##### 1) Representativeness of the exposed cohort

- a) Truly representative of the average **general population of that age** in the community  
\* (all subjects or random sampling)
- b) Somewhat representative of the average **general population of that age** in the community \*(non-random sampling)
- c) Selected group of users eg nurses, volunteers
- d) No description of the derivation of the cohort

##### 2) Sample size

- a) Justified\*
- b) Non-justified

##### 3) Non-respondents

- a) Comparability between respondents and non-respondents characteristics is established, and the response rate is satisfactory\*
- b) The response rate is unsatisfactory, or the comparability between respondents and non-respondents is unsatisfactory
- c) No description of the response rate or the characteristics of the responders and the non-responders

##### 4) Ascertainment of the exposure (risk factor):

- a) Validated measurement tool \*\*
- b) Non-validated measurement tool, but the tool is available or described \*
- c) No description of the measurement tool

#### Comparability (Maximum 2 stars)

##### 1) The subjects in different outcome groups are comparable, based on the study design or analysis. Confounding factors are controlled

- a) Study controls for **age** \*
- b) Study controls for any **additional fracture risk factors** \*

#### Outcome (Maximum 3 stars)

##### 1) Assessment of outcome

- a) Independent blind assessment \*\*
- b) Record linkage \*\*

1  
2  
3 c) Self-report \*

4 d) No description  
5

6 **2) Statistical test**

7 a) The statistical test used to describe the data is clearly described and appropriate, and  
8 the measurement of the association is presented, including confidence intervals and the  
9 probability level (p value) \*

10  
11  
12 b) The statistical test is not appropriate, not described or incomplete  
13  
14  
15  
16  
17  
18  
19  
20  
21  
22  
23  
24  
25  
26  
27  
28  
29  
30  
31  
32  
33  
34  
35  
36  
37  
38  
39  
40  
41  
42  
43  
44  
45  
46  
47  
48  
49  
50  
51  
52  
53  
54  
55  
56  
57  
58  
59  
60

**PRISMA-P (Preferred Reporting Items for Systematic review and Meta-Analysis Protocols) 2015 checklist: recommended items to address in a systematic review protocol\***

| Section and topic                 | Item No | Checklist item                                                                                                                                                                                                                | Page number |
|-----------------------------------|---------|-------------------------------------------------------------------------------------------------------------------------------------------------------------------------------------------------------------------------------|-------------|
| <b>ADMINISTRATIVE INFORMATION</b> |         |                                                                                                                                                                                                                               |             |
| Title:                            |         |                                                                                                                                                                                                                               |             |
| Identification                    | 1a      | Identify the report as a protocol of a systematic review                                                                                                                                                                      | 1           |
| Update                            | 1b      | If the protocol is for an update of a previous systematic review, identify as such                                                                                                                                            | NA          |
| Registration                      | 2       | If registered, provide the name of the registry (such as PROSPERO) and registration number                                                                                                                                    | 2,6         |
| Authors:                          |         |                                                                                                                                                                                                                               |             |
| Contact                           | 3a      | Provide name, institutional affiliation, e-mail address of all protocol authors; provide physical mailing address of corresponding author                                                                                     | 1           |
| Contributions                     | 3b      | Describe contributions of protocol authors and identify the guarantor of the review                                                                                                                                           | 12          |
| Amendments                        | 4       | If the protocol represents an amendment of a previously completed or published protocol, identify as such and list changes; otherwise, state plan for documenting important protocol amendments                               | NA          |
| Support:                          |         |                                                                                                                                                                                                                               |             |
| Sources                           | 5a      | Indicate sources of financial or other support for the review                                                                                                                                                                 | 12          |
| Sponsor                           | 5b      | Provide name for the review funder and/or sponsor                                                                                                                                                                             | 12          |
| Role of sponsor or funder         | 5c      | Describe roles of funder(s), sponsor(s), and/or institution(s), if any, in developing the protocol                                                                                                                            | 12          |
| <b>INTRODUCTION</b>               |         |                                                                                                                                                                                                                               |             |
| Rationale                         | 6       | Describe the rationale for the review in the context of what is already known                                                                                                                                                 | 5           |
| Objectives                        | 7       | Provide an explicit statement of the question(s) the review will address with reference to participants, interventions, comparators, and outcomes (PICO)                                                                      | 6           |
| <b>METHODS</b>                    |         |                                                                                                                                                                                                                               |             |
| Eligibility criteria              | 8       | Specify the study characteristics (such as PICO, study design, setting, time frame) and report characteristics (such as years considered, language, publication status) to be used as criteria for eligibility for the review | 6-8         |
| Information sources               | 9       | Describe all intended information sources (such as electronic databases, contact with study authors, trial registers or other grey literature sources) with planned dates of coverage                                         | 8-9         |
| Search strategy                   | 10      | Present draft of search strategy to be used for at least one electronic database, including planned limits, such that it could be repeated                                                                                    | 16          |

|                                    |     |                                                                                                                                                                                                                                                  |       |
|------------------------------------|-----|--------------------------------------------------------------------------------------------------------------------------------------------------------------------------------------------------------------------------------------------------|-------|
| Study records:                     |     |                                                                                                                                                                                                                                                  |       |
| Data management                    | 11a | Describe the mechanism(s) that will be used to manage records and data throughout the review                                                                                                                                                     | 8     |
| Selection process                  | 11b | State the process that will be used for selecting studies (such as two independent reviewers) through each phase of the review (that is, screening, eligibility and inclusion in meta-analysis)                                                  | 8     |
| Data collection process            | 11c | Describe planned method of extracting data from reports (such as piloting forms, done independently, in duplicate), any processes for obtaining and confirming data from investigators                                                           | 9     |
| Data items                         | 12  | List and define all variables for which data will be sought (such as PICO items, funding sources), any pre-planned data assumptions and simplifications                                                                                          | 9     |
| Outcomes and prioritization        | 13  | List and define all outcomes for which data will be sought, including prioritization of main and additional outcomes, with rationale                                                                                                             | 7     |
| Risk of bias in individual studies | 14  | Describe anticipated methods for assessing risk of bias of individual studies, including whether this will be done at the outcome or study level, or both; state how this information will be used in data synthesis                             | 9     |
| Data synthesis                     | 15a | Describe criteria under which study data will be quantitatively synthesised                                                                                                                                                                      | 9-10  |
|                                    | 15b | If data are appropriate for quantitative synthesis, describe planned summary measures, methods of handling data and methods of combining data from studies, including any planned exploration of consistency (such as $I^2$ , Kendall's $\tau$ ) | 9-10  |
|                                    | 15c | Describe any proposed additional analyses (such as sensitivity or subgroup analyses, meta-regression)                                                                                                                                            | 10-11 |
|                                    | 15d | If quantitative synthesis is not appropriate, describe the type of summary planned                                                                                                                                                               | NA    |
| Meta-bias(es)                      | 16  | Specify any planned assessment of meta-bias(es) (such as publication bias across studies, selective reporting within studies)                                                                                                                    | 11    |
| Confidence in cumulative evidence  | 17  | Describe how the strength of the body of evidence will be assessed (such as GRADE)                                                                                                                                                               | 9     |

**\* It is strongly recommended that this checklist be read in conjunction with the PRISMA-P Explanation and Elaboration (cite when available) for important clarification on the items. Amendments to a review protocol should be tracked and dated. The copyright for PRISMA-P (including checklist) is held by the PRISMA-P Group and is distributed under a Creative Commons Attribution Licence 4.0.**

*From: Shamseer L, Moher D, Clarke M, Ghersi D, Liberati A, Petticrew M, Shekelle P, Stewart L, PRISMA-P Group. Preferred reporting items for systematic review and meta-analysis protocols (PRISMA-P) 2015: elaboration and explanation. BMJ. 2015 Jan 2;349(jan02 1):g7647.*

# BMJ Open

## Abdominal aortic calcification, bone mineral density and fractures: a systematic review and meta-analysis protocol

|                                 |                                                                                                                                                                                                                                                                                                                                                                                                                                                                                                                                                                                                                                                                                                                                                                                                                                                                                                                                                                                                                                                                                                                                                                                                                                                                                                                                                                                                                                                                                                                                                                                                                                       |
|---------------------------------|---------------------------------------------------------------------------------------------------------------------------------------------------------------------------------------------------------------------------------------------------------------------------------------------------------------------------------------------------------------------------------------------------------------------------------------------------------------------------------------------------------------------------------------------------------------------------------------------------------------------------------------------------------------------------------------------------------------------------------------------------------------------------------------------------------------------------------------------------------------------------------------------------------------------------------------------------------------------------------------------------------------------------------------------------------------------------------------------------------------------------------------------------------------------------------------------------------------------------------------------------------------------------------------------------------------------------------------------------------------------------------------------------------------------------------------------------------------------------------------------------------------------------------------------------------------------------------------------------------------------------------------|
| Journal:                        | <i>BMJ Open</i>                                                                                                                                                                                                                                                                                                                                                                                                                                                                                                                                                                                                                                                                                                                                                                                                                                                                                                                                                                                                                                                                                                                                                                                                                                                                                                                                                                                                                                                                                                                                                                                                                       |
| Manuscript ID                   | bmjopen-2018-026232.R1                                                                                                                                                                                                                                                                                                                                                                                                                                                                                                                                                                                                                                                                                                                                                                                                                                                                                                                                                                                                                                                                                                                                                                                                                                                                                                                                                                                                                                                                                                                                                                                                                |
| Article Type:                   | Protocol                                                                                                                                                                                                                                                                                                                                                                                                                                                                                                                                                                                                                                                                                                                                                                                                                                                                                                                                                                                                                                                                                                                                                                                                                                                                                                                                                                                                                                                                                                                                                                                                                              |
| Date Submitted by the Author:   | 19-Dec-2018                                                                                                                                                                                                                                                                                                                                                                                                                                                                                                                                                                                                                                                                                                                                                                                                                                                                                                                                                                                                                                                                                                                                                                                                                                                                                                                                                                                                                                                                                                                                                                                                                           |
| Complete List of Authors:       | Rodriguez, Alex; Bone and Muscle Health Research Group, School of Clinical Sciences at Monash Health, Monash Medical Centre<br>Leow, Kevin; The University of Sydney, Centre for Kidney Research, School of Public Health, Sydney Medical School, Children's Hospital at Westmead<br>Szulc, Pawel; INSERM UMR 1033, University of Lyon, Hospices Civils de Lyon<br>Scott, David ; Bone and Muscle Health Research Group, School of Clinical Sciences at Monash Health, Monash Medical Centre<br>Ebeling, Peter; Bone and Muscle Health Research Group, School of Clinical Sciences at Monash Health, Monash Medical Centre<br>Sim, Marc; Edith Cowan University, School of Medical and Health Sciences; The University of Western Australia, Medical School, Royal Perth Hospital Unit<br>Wong, Germaine; The Children's Hospital at Westmead, Centre for Kidney Research<br>Lim, Wai H.; Sir Charles Gairdner Hospital, Department of Renal Medicine; University of Western Australia,<br>Schousboe, John; Park Nicollet Osteoporosis Center and HealthPartners Institute, Minneapolis, MN, USA; and Division of Health Policy and Management, University of Minnesota<br>Kiel, Douglas; Institute for Aging Research, Hebrew Senior Life, Beth Israel Deaconess Medical Center, Harvard Medical School<br>Prince, Richard ; Medical School, The University of Western Australia; Department of Endocrinology and Diabetes, Sir Charles Gairdner Hospital<br>R. Lewis, Joshua; School of Medical and Health Sciences, Edith Cowan University; Children's Hospital at Westmead Centre for Kidney Research, Centre for Kidney Research |
| <b>Primary Subject Heading</b>: | Rheumatology                                                                                                                                                                                                                                                                                                                                                                                                                                                                                                                                                                                                                                                                                                                                                                                                                                                                                                                                                                                                                                                                                                                                                                                                                                                                                                                                                                                                                                                                                                                                                                                                                          |
| Secondary Subject Heading:      | Cardiovascular medicine, Radiology and imaging                                                                                                                                                                                                                                                                                                                                                                                                                                                                                                                                                                                                                                                                                                                                                                                                                                                                                                                                                                                                                                                                                                                                                                                                                                                                                                                                                                                                                                                                                                                                                                                        |
| Keywords:                       | vascular calcification, bone mineral density, fracture, abdominal aorta, vascular disease                                                                                                                                                                                                                                                                                                                                                                                                                                                                                                                                                                                                                                                                                                                                                                                                                                                                                                                                                                                                                                                                                                                                                                                                                                                                                                                                                                                                                                                                                                                                             |
|                                 |                                                                                                                                                                                                                                                                                                                                                                                                                                                                                                                                                                                                                                                                                                                                                                                                                                                                                                                                                                                                                                                                                                                                                                                                                                                                                                                                                                                                                                                                                                                                                                                                                                       |

1  
2  
3  
4  
5  
6  
7  
8  
9  
10  
11  
12  
13  
14  
15  
16  
17  
18  
19  
20  
21  
22  
23  
24  
25  
26  
27  
28  
29  
30  
31  
32  
33  
34  
35  
36  
37  
38  
39  
40  
41  
42  
43  
44  
45  
46  
47  
48  
49  
50  
51  
52  
53  
54  
55  
56  
57  
58  
59  
60

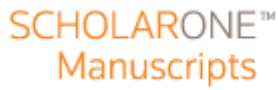

1  
2  
3 **Abdominal aortic calcification, bone mineral density and fractures:**  
4  
5 **a systematic review and meta-analysis protocol**  
6  
7  
8  
9

10 Alexander Rodriguez<sup>1</sup>, Kevin Leow<sup>2</sup>, Pawel Szulc<sup>3</sup>, David Scott<sup>1</sup>, Peter Ebeling<sup>1</sup>, Marc Sim<sup>4,5</sup>,  
11 Germaine Wong<sup>2</sup>, Wai H. Lim<sup>5,6</sup>, John T. Schousboe<sup>7</sup>, Douglas P. Kiel<sup>8</sup>, Richard L. Prince<sup>5,9</sup>,  
12 and Joshua R. Lewis<sup>2,4,5</sup>  
13  
14  
15  
16

17  
18  
19  
20 **Affiliations**  
21

22  
23 <sup>1</sup> Bone and Muscle Health Research Group, School of Clinical Sciences at Monash Health,  
24 Monash Medical Centre, Victoria, Australia;

25  
26  
27 <sup>2</sup> The University of Sydney, Centre for Kidney Research, School of Public Health, Sydney  
28 Medical School, Children's Hospital at Westmead, New South Wales, Australia;

29  
30  
31 <sup>3</sup> INSERM UMR 1033, University of Lyon, Hospices Civils de Lyon, Lyon, France;

32  
33  
34 <sup>4</sup> School of Medical and Health Sciences, Edith Cowan University, Joondalup, Australia;

35  
36  
37 <sup>5</sup> Medical School, University of Western Australia, Perth, Australia;

38  
39  
40 <sup>6</sup> Department of Renal Medicine, Sir Charles Gairdner Hospital, Perth, Australia;

41  
42  
43 <sup>7</sup> Park Nicollet Osteoporosis Center and HealthPartners Institute, Minneapolis, MN, USA and  
44 Division of Health Policy and Management, University of Minnesota, Minneapolis, MN,  
45 USA;

46  
47  
48 <sup>8</sup> Institute for Aging Research, Hebrew Senior Life, Beth Israel Deaconess Medical Center,  
49 Harvard Medical School, Boston, MA, USA;

50  
51  
52 <sup>9</sup> Department of Endocrinology and Diabetes, Sir Charles Gairdner Hospital, Perth Australia;  
53  
54  
55

1  
2  
3 **Corresponding author:**  
4

5 Dr Joshua Lewis

Tel: +61 8 6304 4602

6  
7 Edith Cowan University

E-mail: [joshua.lewis@uwa.edu.au](mailto:joshua.lewis@uwa.edu.au)

8  
9 School of Medical and Health Sciences

10  
11  
12 270 Joondalup drive, Joondalup, WA, 6027, AUSTRALIA  
13  
14

15  
16  
17 **Word count:** 1979  
18  
19  
20  
21  
22  
23  
24  
25  
26  
27  
28  
29  
30  
31  
32  
33  
34  
35  
36  
37  
38  
39  
40  
41  
42  
43  
44  
45  
46  
47  
48  
49  
50  
51  
52  
53  
54  
55  
56  
57  
58  
59  
60

For peer review only



## Abstract

**Introduction:** Abdominal aortic calcification (AAC) is associated with low bone mass and increased fracture risk. Two previous meta-analyses have investigated the association between AAC and fracture. However, these meta-analyses only identified articles until December 2016, undertook limited searches and did not explore potential sources of between-study heterogeneity. We aim to undertake a sensitive and comprehensive assessment of the relationship between AAC, bone mineral density (BMD) as well as prevalent and incident fractures.

**Methods:** We will search MEDLINE, EMBASE, Web of Science core collection, and Google scholar (top 200 articles sorted by relevance) from their inception until 1st June 2018. Reference lists of included studies and previous systematic reviews will be hand searched for additional eligible studies. Retrospective and prospective cohort studies (cross-sectional, case-control and longitudinal) reporting the association between AAC, BMD and fracture at any site will be included. At least two investigators will independently: (A) evaluate study eligibility and extract data, with a third investigator to adjudicate when discrepancies occur, (B) assess study quality by the Newcastle-Ottawa Scale for each cohort/study. The meta-analysis will be reported in adherence to the Meta-analysis of Observational Studies in Epidemiology (MOOSE) criteria. AAC will be grouped as either: (1) AAC present or absent, (2) AAC categorised as “low” (referent – lowest reported group) vs. “high” (all other groups) or (3) dose-response when AAC was assessed in  $\geq 3$  groups. Where primary event data was reported in individual studies, pooled risk differences and risk ratios with 95%CI will be calculated, from which, a summary estimate will be determined using DerSimonian-Laird random effects models. For the AAC and BMD pooled analyses estimates will be expressed as standardised mean difference with 95%CI. We will examine the likelihood of publication bias and where

possible, investigate potential reasons for between-study heterogeneity using subgroup analyses and meta-regression.

**Prospero registration number:**CRD42018088019

**Key words:** vascular calcification, bone mineral density, fracture, abdominal aorta, vascular disease

### **Article summary: strengths and limitations**

- Previous meta-analyses have only searched the literature until 2016, have found limited numbers of studies and identified moderate to high amounts of between-study heterogeneity, which for the most part has been unexplained. The planned comprehensive meta-analysis is warranted and will help address uncertainties regarding the measurement of AAC for the prediction of fracture outcomes and understand the role of AAC alongside, but independent of BMD in fracture risk prediction. Additionally, this study will use meta-regression to identify sources of heterogeneity and identify subgroups or subpopulations where AAC is more or less predictive of poorer outcomes.
- To our knowledge there has been no systematic review and meta-analysis that has investigated the association between AAC and BMD, which is along the hypothesised causal pathway to fracture.
- The main limitation of this review is that causality cannot be established due to the observational nature of the studies.
- A further limitation is the differences in imaging modality, measurement and reporting of AAC across studies but we attempted to overcome this by exploring these aspects in pre-specified sub-analyses.

## Introduction

Vascular and bone diseases are both chronic age-related disease that share many common dietary and lifestyle risk factors and cause considerable morbidity and mortality <sup>1</sup>. Atherosclerotic lesions in the abdominal aorta generally begin around the major vessel bifurcations and branching arteries such as the inferior mesenteric artery and the lumbar arteries that supply blood and nutrients to the lumbar vertebrae. <sup>2</sup> Occlusion of these vessels may causes ischemia in the lumbar spine and may result in disc degeneration and asymptomatic vertebral fractures. <sup>3</sup> Additionally the underlying processes regulating arterial calcification share many similarities to bone physiology <sup>4</sup> and calcified atherosclerotic plaques release both local and systemic osteochondrogenic factors that may affect regional and systemic bone homeostasis. <sup>5</sup> Conversely circulating levels of factors regulating bone homeostasis may also regulate vascular calcifications <sup>6</sup> with a number of studies demonstrating osteoporosis and bone mineral density being a risk factor for cardiovascular disease (CVD). <sup>7 8</sup>

Assessment of lateral spine images are often undertaken to detect prevalent vertebral fractures and have been shown to improve fracture prediction. <sup>9-11</sup> These images can also be used to assess the degree of abdominal aortic calcification (AAC). To date there are conflicting findings as to whether AAC is associated with bone mineral density and fractures and whether or not these associations are due to ageing, shared fracture risk factors or are a non-traditional independent fracture risk factor. Recent meta-analyses published in 2016 <sup>12</sup> and 2017 <sup>13</sup>, looking at observational studies, showed that people with any or high AAC were at greater risk of fractures than those with no or low AAC. However, the previous studies by Chen et al. <sup>12</sup> and Wei et al. <sup>13</sup>, only identified a limited number of articles due to the search strategies employed (searches found 91 and 105 articles respectively) and the meta-analyses missed many of the known studies in the area (by way of example - both studies missed Wang et al. <sup>14</sup>). For example, our recent search identified 1561 potentially eligible reports. Furthermore, studies

1  
2  
3 identified moderate-high unexplained heterogeneity that needs to be explored further. As such  
4  
5 uncertainty exists as to the importance of identifying AAC for incident fracture risk,  
6  
7 particularly with respect to AAC cut points, types of fracture and potential explanations for the  
8  
9 observed between-study heterogeneity. We will therefore undertake a meta-analysis of studies  
10  
11 reporting on AAC, bone mineral density (BMD) at any site and prevalent and incident fractures  
12  
13 at any site.  
14  
15

## 16 17 18 **Objectives**

- 19  
20 1. To determine the association between AAC with BMD at any site.
- 21  
22 2. To determine the association between AAC with prevalent fractures (cross-sectional)  
23  
24 by reported prevalent fracture sites.
- 25  
26 3. To determine the association between AAC with incident fractures by reported incident  
27  
28 fracture sites.
- 29  
30 4. To assess the impact of potential effect modifiers, including aspects of clinical,  
31  
32 methodological and statistical heterogeneity on previous published findings.  
33  
34  
35

## 36 37 **Methods and Analysis**

38  
39 The systematic review and meta-analysis has been registered with PROSPERO  
40  
41 (CRD42018088019) and reported in adherence to the Meta-analysis of Observational Studies  
42  
43 in Epidemiology (MOOSE) reporting criteria <sup>15</sup>.  
44  
45

## 46 47 **Patient and public involvement statement**

48  
49 There is no patient or public involved in this systematic review/meta-analysis.  
50

## 51 52 **Eligibility criteria for studies included in this review**

53  
54 *Criteria for considering studies for review*  
55  
56  
57  
58  
59  
60

- a) Observational studies in humans. These include cohort (both retrospective and prospective cohort studies), case control and cross-sectional studies that report eligible exposure(s) and outcome(s)
- b) Abdominal aortic calcification assessed by any methodology.
- c) Report any bone mineral density measure or prevalent or incident fracture outcome.

#### *Exclusion criteria*

- a) Reviews of existing literature.

#### **Exposure**

AAC identified from either radiography, DXA machine or CT. AAC will be presented as;

- a) AAC present or absent or
- b) AAC categorized as low (referent – lowest reported group) vs. moderate to high (all other reported groups).
- c) AAC dose-response when AAC was assessed in three or more groups categorised as low (lowest reported category), moderate (middle reported category[ies]) and high (highest reported category).

#### **Outcomes**

1. Bone mineral density (by site).
2. Prevalent fractures (by fracture site).
3. Incident fractures (by fracture site).

#### **Cohort characteristics for meta-regression (where available)**

- Cohort age (cohort mean)
- Gender (% female)
- Years since menopause (cohort mean)
- Hormone replacement therapy (%)

- Modality of assessing AAC (DXA, standard radiograph or CT).
- Cut points chosen for comparison (low vs high, tertiles etc.)
- Diabetes (% of cohort)
- Current smoker (% of cohort)
- History of smoking (% of cohort)
- Body mass index (cohort mean)
- Chronic kidney disease (% of cohort)
- History of CVD (% of cohort)
- Location of study (Europe, Asia-Pacific, North America), i.e. are associations consistent across ethnicities and nation wealth
- Prevalence of CVD medication use (% of cohort)
- History of fracture (% of cohort)

## Study Design

### Search strategies

A comprehensive literature search within MEDLINE, Web of Science core collection and EMBASE databases will be conducted to source all possibly relevant studies for review, without language restriction. Google scholar will be searched for the top 200 articles sorted by relevance. The search terms will be combined with the boolean “AND” to find all potentially relevant studies. Conference proceedings and abstracts will also be evaluated. A hand search of reference lists of eligible studies and previous meta-analyses will also be undertaken. Non-English papers will be translated and evaluated for eligibility. If more than one publication of a study is retrieved, articles with the most up to date and complete information will be included, although additional unique data from all sources will be considered and included when relevant. Examples of the search strategy are shown in **Table 1**.

### **Process for selecting studies**

Two or more independent authors [A.J.R., K.L., M.S. and J.R.L.] will assess retrieved citations to assess studies for eligibility. Briefly the process for selecting studies for inclusion in the review and meta-analysis will be as follows: merge all identified records using EndNote; remove duplicate records of the same report; retrieve full text of the potentially relevant reports; link together multiple reports of the same study (using the first or largest report as the primary record and subsequent reports to supplement other data); examine full-text reports for compliance with eligibility criteria; correspond with investigators, where appropriate, to clarify study eligibility and request missing data; make final decisions on study inclusion. Discrepancies about inclusion will be resolved via iteration and consensus or a third reviewer if consensus cannot be reached between the two reviewers. Excluded studies identified that may plausibly be expected to be included will be reported in supplementary data with a detailed explanation for the reason of exclusion.

### **Risk of bias and quality assessment**

The risk of bias for observational studies will be assessed using the Newcastle-Ottawa Scale (NOS). An example of this scale is provided in Supplementary Material 1A, 1B, 1C, 1D. In addition publication bias will be assessed by visual inspection of a funnel plots and the Egger's and Begg's regression tests. Summary estimates of the confidence placed on the evidence will be evaluated using the Grading of Recommendations Assessment Development and Evaluation (GRADE) of evidence about prognosis. GRADE for evidence about prognosis starts with high quality evidence that can then be rated down. These criteria are based on; a) 5 domains diminishing confidence (-1 for risk of bias, inconsistency, imprecision, indirectness, and publication bias) and b) 2 situations increasing confidence (+1 or +2 for large-very large effect size and a +1 for a dose-response gradient [increasing pooled relative risks for fractures with increasing severity of AAC]).<sup>16</sup>

## Statistical analysis and data synthesis

Analysis of outcome variables will be presented according to either: (1) AAC present or absent (2) AAC categorised as “low” (referent – lowest reported group) vs. “high” (all other groups) or (3) dose response when AAC was assessed in three or more groups. For the dose-response analysis the lowest reported group (low AAC group) will be compared to the middle group(s) vs the highest reported AAC group (high AAC). Where data on more than three groups of AAC were presented the middle groups were combined as “moderate AAC”. This approach was selected due to many studies reporting on variable number of AAC groups with the majority of studies using different cut-points for these groupings. Data on the severity of AAC quantification presented as a continuous measure or in three or more groupings of AAC will be used to determine the impact of increased abdominal aortic calcium load on outcomes. Where primary event data was reported in individual studies, pooled risk differences and risk ratios (RR) with 95% confidence intervals will be calculated, from which, a summary estimate was determined using DerSimonian-Laird random effects models. For the AAC and BMD pooled analyses estimates will be expressed as standardised mean difference (SMD) with 95% CI. Values will be considered significant if the 95%CI of the point estimate does not cross unity. Between-study heterogeneity will also be investigated by using subgroup analyses and the  $I^2$  statistic by study ID which quantifies inconsistency across studies to assess the impact of heterogeneity on the meta-analysis.<sup>17 18</sup> We will evaluate for heterogeneity using the  $I^2$  statistic and considered the  $I^2$  thresholds of <25%, 25-49%, 50-75% and >75% to represent low, moderate, high and very-high heterogeneity.

## Subgroup analysis and investigation of heterogeneity

We will perform meta-regression of cohort characteristics to identify factors potentially explaining heterogeneity as well as performing subgroup analyses. P values of <0.01 will be



1  
2  
3 considered statistically significant for subgroup analyses. Pre-planned subgroup analyses to  
4  
5 explore statistical heterogeneity will include stratification by:  
6  
7

- 8 1. Subgroups based on clinical heterogeneity e.g. disease populations (general population,  
9  
10 diabetics, chronic kidney disease, other) and age groups (<60 years, 60-69 years and  
11  
12  $\geq 70$  years).
- 13  
14 2. Methodological heterogeneity e.g. AAC assessment methods (Radiography, Dual X-  
15  
16 ray absorptiometry or CT), thresholds to define high or severe AAC, fracture reporting  
17  
18 and validation.
- 19  
20  
21 3. Statistical heterogeneity e.g. cohort characteristics (mean ages of the cohorts)  
22  
23  
24  
25  
26

### 27 **Further analyses**

28  
29 Where data on the severity of AAC quantification is presented as a continuous measure or in  
30  
31 tertile/categories these data will be used to determine the impact of increased abdominal aortic  
32  
33 calcium load on prognosis. \*Where AAC is not scored using the AAC24 scale equivalent  
34  
35 values will be relative to estimated vertebral heights from similar aged populations. Where  
36  
37 AAC is assessed by CT the categorical low vs moderate and high AAC will be used.  
38  
39  
40

### 41 **Sensitivity analysis**

42  
43 We will carry out sensitivity analyses for:  
44  
45

- 46 1. Large studies alone to establish how much they dominate the results ( $n > 500$   
47  
48 participants).
- 49  
50 2. Methodology - we will assess the methodological quality of studies using the  
51  
52 Newcastle-Ottawa Scale (NOS) for assessing the quality of nonrandomised studies in  
53  
54 meta-analyses (Supplementary Material 1). For the purpose of this sensitivity analysis  
55  
56 we will use 3 categories of quality (Good, Fair, or Poor).  
57  
58  
59  
60

- 1
- 2
- 3 3. Studies conducted in individuals without a history of a prior fracture (as this is the
- 4 biggest risk factor for a new fracture).
- 5
- 6
- 7
- 8 4. Studies conducted in high income vs. low income countries.
- 9
- 10 5. Studies that included non-osteoporotic fractures (fractures of the toes, fingers, face and
- 11 skull fractures)
- 12
- 13
- 14 6. Study design bias comparing outcomes in cross-sectional and prospective studies
- 15 (given that prospective studies may also include prevalent fractures and BMD
- 16 measurements at baseline that can be analysed cross-sectionally).
- 17
- 18
- 19
- 20

### 21 **Concluding statement**

22 Previous meta-analyses on this topic have a number of important limitations. By undertaking  
23 the pre-planned comprehensive review and meta-analysis, we will gain better understanding of  
24 the relationship between abdominal aortic calcification (AAC), bone mineral density and  
25 increased fracture risk. The review will provide impetus for further research, diagnosis and  
26 treatment of this novel fracture risk factor. This review will also evaluate the quality of the  
27 published evidence and our confidence in the estimates for the meta-analysis, while identifying  
28 important knowledge gaps, potential sources of between-study heterogeneity and issues with  
29 imaging, assessing or reporting of AAC in published studies.

30  
31  
32  
33  
34  
35  
36  
37  
38  
39  
40  
41  
42 **Ethics and dissemination:** The systematic review and meta-analysis does not require ethical  
43 approval. The study will be submitted to a peer reviewed journal and disseminated via research  
44 presentations.

### 45 **Data statement**

46  
47  
48  
49  
50  
51  
52  
53  
54  
55  
56  
57  
58  
59  
60  
61  
62  
63  
64  
65  
66  
67  
68  
69  
70  
71  
72  
73  
74  
75  
76  
77  
78  
79  
80  
81  
82  
83  
84  
85  
86  
87  
88  
89  
90  
91  
92  
93  
94  
95  
96  
97  
98  
99  
100  
101  
102  
103  
104  
105  
106  
107  
108  
109  
110  
111  
112  
113  
114  
115  
116  
117  
118  
119  
120  
121  
122  
123  
124  
125  
126  
127  
128  
129  
130  
131  
132  
133  
134  
135  
136  
137  
138  
139  
140  
141  
142  
143  
144  
145  
146  
147  
148  
149  
150  
151  
152  
153  
154  
155  
156  
157  
158  
159  
160  
161  
162  
163  
164  
165  
166  
167  
168  
169  
170  
171  
172  
173  
174  
175  
176  
177  
178  
179  
180  
181  
182  
183  
184  
185  
186  
187  
188  
189  
190  
191  
192  
193  
194  
195  
196  
197  
198  
199  
200  
201  
202  
203  
204  
205  
206  
207  
208  
209  
210  
211  
212  
213  
214  
215  
216  
217  
218  
219  
220  
221  
222  
223  
224  
225  
226  
227  
228  
229  
230  
231  
232  
233  
234  
235  
236  
237  
238  
239  
240  
241  
242  
243  
244  
245  
246  
247  
248  
249  
250  
251  
252  
253  
254  
255  
256  
257  
258  
259  
260  
261  
262  
263  
264  
265  
266  
267  
268  
269  
270  
271  
272  
273  
274  
275  
276  
277  
278  
279  
280  
281  
282  
283  
284  
285  
286  
287  
288  
289  
290  
291  
292  
293  
294  
295  
296  
297  
298  
299  
300  
301  
302  
303  
304  
305  
306  
307  
308  
309  
310  
311  
312  
313  
314  
315  
316  
317  
318  
319  
320  
321  
322  
323  
324  
325  
326  
327  
328  
329  
330  
331  
332  
333  
334  
335  
336  
337  
338  
339  
340  
341  
342  
343  
344  
345  
346  
347  
348  
349  
350  
351  
352  
353  
354  
355  
356  
357  
358  
359  
360  
361  
362  
363  
364  
365  
366  
367  
368  
369  
370  
371  
372  
373  
374  
375  
376  
377  
378  
379  
380  
381  
382  
383  
384  
385  
386  
387  
388  
389  
390  
391  
392  
393  
394  
395  
396  
397  
398  
399  
400  
401  
402  
403  
404  
405  
406  
407  
408  
409  
410  
411  
412  
413  
414  
415  
416  
417  
418  
419  
420  
421  
422  
423  
424  
425  
426  
427  
428  
429  
430  
431  
432  
433  
434  
435  
436  
437  
438  
439  
440  
441  
442  
443  
444  
445  
446  
447  
448  
449  
450  
451  
452  
453  
454  
455  
456  
457  
458  
459  
460  
461  
462  
463  
464  
465  
466  
467  
468  
469  
470  
471  
472  
473  
474  
475  
476  
477  
478  
479  
480  
481  
482  
483  
484  
485  
486  
487  
488  
489  
490  
491  
492  
493  
494  
495  
496  
497  
498  
499  
500  
501  
502  
503  
504  
505  
506  
507  
508  
509  
510  
511  
512  
513  
514  
515  
516  
517  
518  
519  
520  
521  
522  
523  
524  
525  
526  
527  
528  
529  
530  
531  
532  
533  
534  
535  
536  
537  
538  
539  
540  
541  
542  
543  
544  
545  
546  
547  
548  
549  
550  
551  
552  
553  
554  
555  
556  
557  
558  
559  
560  
561  
562  
563  
564  
565  
566  
567  
568  
569  
570  
571  
572  
573  
574  
575  
576  
577  
578  
579  
580  
581  
582  
583  
584  
585  
586  
587  
588  
589  
590  
591  
592  
593  
594  
595  
596  
597  
598  
599  
600  
601  
602  
603  
604  
605  
606  
607  
608  
609  
610  
611  
612  
613  
614  
615  
616  
617  
618  
619  
620  
621  
622  
623  
624  
625  
626  
627  
628  
629  
630  
631  
632  
633  
634  
635  
636  
637  
638  
639  
640  
641  
642  
643  
644  
645  
646  
647  
648  
649  
650  
651  
652  
653  
654  
655  
656  
657  
658  
659  
660  
661  
662  
663  
664  
665  
666  
667  
668  
669  
670  
671  
672  
673  
674  
675  
676  
677  
678  
679  
680  
681  
682  
683  
684  
685  
686  
687  
688  
689  
690  
691  
692  
693  
694  
695  
696  
697  
698  
699  
700  
701  
702  
703  
704  
705  
706  
707  
708  
709  
710  
711  
712  
713  
714  
715  
716  
717  
718  
719  
720  
721  
722  
723  
724  
725  
726  
727  
728  
729  
730  
731  
732  
733  
734  
735  
736  
737  
738  
739  
740  
741  
742  
743  
744  
745  
746  
747  
748  
749  
750  
751  
752  
753  
754  
755  
756  
757  
758  
759  
760  
761  
762  
763  
764  
765  
766  
767  
768  
769  
770  
771  
772  
773  
774  
775  
776  
777  
778  
779  
780  
781  
782  
783  
784  
785  
786  
787  
788  
789  
790  
791  
792  
793  
794  
795  
796  
797  
798  
799  
800  
801  
802  
803  
804  
805  
806  
807  
808  
809  
810  
811  
812  
813  
814  
815  
816  
817  
818  
819  
820  
821  
822  
823  
824  
825  
826  
827  
828  
829  
830  
831  
832  
833  
834  
835  
836  
837  
838  
839  
840  
841  
842  
843  
844  
845  
846  
847  
848  
849  
850  
851  
852  
853  
854  
855  
856  
857  
858  
859  
860  
861  
862  
863  
864  
865  
866  
867  
868  
869  
870  
871  
872  
873  
874  
875  
876  
877  
878  
879  
880  
881  
882  
883  
884  
885  
886  
887  
888  
889  
890  
891  
892  
893  
894  
895  
896  
897  
898  
899  
900  
901  
902  
903  
904  
905  
906  
907  
908  
909  
910  
911  
912  
913  
914  
915  
916  
917  
918  
919  
920  
921  
922  
923  
924  
925  
926  
927  
928  
929  
930  
931  
932  
933  
934  
935  
936  
937  
938  
939  
940  
941  
942  
943  
944  
945  
946  
947  
948  
949  
950  
951  
952  
953  
954  
955  
956  
957  
958  
959  
960  
961  
962  
963  
964  
965  
966  
967  
968  
969  
970  
971  
972  
973  
974  
975  
976  
977  
978  
979  
980  
981  
982  
983  
984  
985  
986  
987  
988  
989  
990  
991  
992  
993  
994  
995  
996  
997  
998  
999  
1000

### 56 **Conflicts of interest**

57 The authors declare that there is no conflict of interests in this study protocol.

### 58 **Funding and acknowledgements**

1  
2  
3 The salaries of J.R.L. and D.S. are supported by a National Health and Medical Research  
4 Council of Australia (NHMRC) Career Development Fellowship (ID: 1107474 and 1123014,  
5  
6 respectively). Funding agencies had no input into any aspect of the design and management of  
7  
8 this study.  
9  
10

### 11 12 **Author contribution**

13  
14 A.R, K.L, P.S, D.S, P.E, M.S, G.W, W.H.L, J.T.S, D.P.K, R.L.P and J.R.L contributed to the  
15  
16 study concept and design. A.R and K.L led the writing of the manuscript and is the primary  
17  
18 designer of the protocol under the guidance of J.R.L, J.T.S and P.S and all-authors conceived  
19  
20 the conceptual ideas presented in the revised protocol critically. All authors read and approved  
21  
22 the revised version and final supported versions. J.R.L has the primary responsibility for the  
23  
24 final content.  
25  
26  
27  
28  
29  
30

### 31 **References**

- 32  
33 1. Farhat GN, Cauley JA. The link between osteoporosis and cardiovascular disease. *Clin*  
34  
35 *Cases Miner Bone Metab* 2008;5(1):19-34.  
36  
37  
38 2. Lillemark L, Ganz M, Barascuk N, et al. Growth patterns of abdominal atherosclerotic  
39  
40 calcified deposits from lumbar lateral X-rays. *Int J Cardiovasc Imaging*  
41  
42 2010;26(7):751-61. doi: 10.1007/s10554-010-9606-3  
43  
44  
45 3. Kauppila LI, Mikkonen R, Mankinen P, et al. MR aortography and serum cholesterol  
46  
47 levels in patients with long-term nonspecific lower back pain. *Spine*  
48  
49 2004;29(19):2147-52.  
50  
51  
52 4. Thompson B, Towler DA. Arterial calcification and bone physiology: role of the bone-  
53  
54 vascular axis. *Nat Rev Endocrinol* 2012;8(9):529-43. doi: 10.1038/nrendo.2012.36  
55  
56 [published Online First: 2012/04/05]  
57  
58  
59  
60

- 1  
2  
3 5. Szulc P. Abdominal aortic calcification: A reappraisal of epidemiological and  
4  
5 pathophysiological data. *Bone* 2016;84:25-37. doi: 10.1016/j.bone.2015.12.004  
6  
7
- 8 6. Touw WA, Ueland, T., Bollerslev, J., Schousboe, J.T., Lim, W.H., Wong, G, Thompson,  
9  
10 P.L., Kiel, D.P., Prince, R.L., Rivadeneira, F., Lewis, J.R. Association of Circulating  
11  
12 Wnt Antagonists With Severe Abdominal Aortic Calcification in Elderly Women. *J*  
13  
14 *Endocrine Soc*2017;1(1):26-38. doi: 10.1210/js.2016-1040  
15  
16
- 17 7. Warburton DE, Nicol CW, Gatto SN, et al. Cardiovascular disease and osteoporosis:  
18  
19 balancing risk management. *Vasc Health Risk Manag* 2007;3(5):673-89. [published  
20  
21 Online First: 2007/12/15]  
22  
23
- 24 8. Tanko LB, Christiansen C, Cox DA, et al. Relationship between osteoporosis and  
25  
26 cardiovascular disease in postmenopausal women. *J Bone Min Res* 2005;20(11):1912-  
27  
28 20. doi: 10.1359/JBMR.050711 [published Online First: 2005/10/20]  
29  
30
- 31 9. Ferrar L, Roux C, Felsenberg D, et al. Association between incident and baseline vertebral  
32  
33 fractures in European women: vertebral fracture assessment in the Osteoporosis and  
34  
35 Ultrasound Study (OPUS). *Osteoporosis International* 2012;23(1):59-65. doi:  
36  
37 10.1007/s00198-011-1701-3  
38  
39
- 40 10. Black DM, Arden NK, Palermo L, et al. Prevalent vertebral deformities predict hip  
41  
42 fractures and new vertebral deformities but not wrist fractures. Study of Osteoporotic  
43  
44 Fractures Research Group. *J Bone Min Res* 1999;14(5):821-8. doi:  
45  
46 10.1359/jbmr.1999.14.5.821  
47  
48
- 49 11. Ross PD, Genant HK, Davis JW, et al. Predicting vertebral fracture incidence from  
50  
51 prevalent fractures and bone density among non-black, osteoporotic women.  
52  
53 *Osteoporosis Int* 1993;3(3):120-6.  
54  
55
- 56 12. Chen Z, Yu Y. Aortic calcification was associated with risk of fractures: A meta-analysis.  
57  
58 *J Back Musculoskeletal Rehab* 2016;29(4):635-42.  
59  
60

- 1  
2  
3  
4  
5  
6  
7  
8  
9  
10  
11  
12  
13  
14  
15  
16  
17  
18  
19  
20  
21  
22  
23  
24  
25  
26  
27  
28  
29  
30  
31  
32  
33  
34  
35  
36  
37  
38  
39  
40  
41  
42  
43  
44  
45  
46  
47  
48  
49  
50  
51  
52  
53  
54  
55  
56  
57  
58  
59  
60
13. Wei D, Zheng G, Gao Y, et al. Abdominal aortic calcification and the risk of bone fractures: a meta-analysis of prospective cohort studies. *J Bone Mineral Metab* 2017;1-8.
  14. Wang TKM, Bolland MJ, Pelt NCv, et al. Relationships between vascular calcification, calcium metabolism, bone density, and fractures. *J Bone Min Res* 2010;25(12):2777-85.
  15. Stroup DF, Berlin JA, Morton SC, et al. Meta-analysis of observational studies in epidemiology: a proposal for reporting. Meta-analysis Of Observational Studies in Epidemiology (MOOSE) group. *JAMA* 2000;283(15):2008-12. [published Online First: 2000/05/02]
  16. Iorio A, Spencer FA, Falavigna M, et al. Use of GRADE for assessment of evidence about prognosis: rating confidence in estimates of event rates in broad categories of patients. *BMJ* 2015;350:h870. doi: 10.1136/bmj.h870
  17. Higgins JP, Thompson SG. Quantifying heterogeneity in a meta-analysis. *Stat Med* 2002;21(11):1539-58. doi: 10.1002/sim.1186 [published Online First: 2002/07/12]
  18. Higgins JP, Thompson SG, Deeks JJ, et al. Measuring inconsistency in meta-analyses. *BMJ* 2003;327(7414):557-60. doi: 10.1136/bmj.327.7414.557 [published Online First: 2003/09/06]

**Table 1.** Example search strategies

| <b>Keyword</b>                              | <b>MEDLINE</b>                                                                                                                                                                                                                                                                                                                                                                                                                                                                                                        | <b>Embase</b>                                                                                                                                                                                                                                                                                                                                                                                                                                                                                            |
|---------------------------------------------|-----------------------------------------------------------------------------------------------------------------------------------------------------------------------------------------------------------------------------------------------------------------------------------------------------------------------------------------------------------------------------------------------------------------------------------------------------------------------------------------------------------------------|----------------------------------------------------------------------------------------------------------------------------------------------------------------------------------------------------------------------------------------------------------------------------------------------------------------------------------------------------------------------------------------------------------------------------------------------------------------------------------------------------------|
| Population = Adults                         | No search strategy                                                                                                                                                                                                                                                                                                                                                                                                                                                                                                    | No search strategy                                                                                                                                                                                                                                                                                                                                                                                                                                                                                       |
| Intervention/Test =<br>aortic calcification | exp Vascular Calcification/ or<br>exp Calcinosis/ or exp Vascular<br>Diseases/ or arterial<br>calcification.mp or exp<br>Arteriosclerosis/ or exp Arterial<br>Occlusive Diseases/ or exp<br>Aortic Diseases/ or aortic.mp or<br>vascular calcifications.mp. or exp<br>Vascular Calcification/ or<br>calcified atherosclerosis.mp or<br>calcification.mp or calcified<br>atherosclerotic plaque.mp or<br>arterial calcium.mp or aortic<br>calcification.mp or aorta<br>calcification.mp and aort\$.mp<br>and calc\$.mp | vascular calcification.mp. or exp<br>blood vessel calcification/ or<br>artery calcification.mp. or exp<br>artery calcification/ or exp<br>coronary artery disease/ or exp<br>arteriosclerosis/ or calcified<br>atherosclerosis.mp or arterial<br>calcium.mp or calcified<br>atherosclerotic plaque.mp or<br>calcification.mp or aortic<br>calcification.mp or aorta<br>calcification.mp or vascular<br>calcifications.mp or<br>arteriosclerosis.mp or<br>extracoronary.mp and aort\$.mp<br>and calc\$.mp |
| Methodology =<br>observational              | No search strategy                                                                                                                                                                                                                                                                                                                                                                                                                                                                                                    | No search strategy                                                                                                                                                                                                                                                                                                                                                                                                                                                                                       |
| Comparator = None                           | No search strategy                                                                                                                                                                                                                                                                                                                                                                                                                                                                                                    | No search strategy                                                                                                                                                                                                                                                                                                                                                                                                                                                                                       |
| Outcome =                                   | bone mineral density.mp or exp<br>Bone Density/ or Fracture.mp or<br>Fractures.mp                                                                                                                                                                                                                                                                                                                                                                                                                                     | bone mineral density.mp or exp<br>bone density/ or fracture.mp or<br>fractures.mp or exp fracture/                                                                                                                                                                                                                                                                                                                                                                                                       |
| Additional specific<br>filters              | Human                                                                                                                                                                                                                                                                                                                                                                                                                                                                                                                 | Human                                                                                                                                                                                                                                                                                                                                                                                                                                                                                                    |

\*The reference lists of recent literature reviews and guidelines will be hand-searched for possibly relevant studies.

## **SUPPLEMENTARY MATERIAL 1A**

### **NEWCASTLE - OTTAWA QUALITY ASSESSMENT SCALE - CASE CONTROL STUDIES**

Note: A study can be awarded a maximum of one star for each numbered item within the Selection and Exposure categories. A maximum of two stars can be given for Comparability.

#### **Selection**

##### **1) Is the case definition adequate?**

- a) yes, with independent validation \*
- b) yes, e.g. record linkage or based on self reports
- c) no description

##### **2) Representativeness of the cases**

- a) consecutive or obviously representative series of cases \*
- b) potential for selection biases or not stated

##### **3) Selection of Controls**

- a) community controls \*
- b) hospital controls
- c) no description

##### **4) Definition of Controls**

- a) no history of disease (endpoint) \*
- b) no description of source

#### **Comparability**

##### **1) Comparability of cases and controls on the basis of the design or analysis**

- a) study controls for fracture risk factors (age) \*
- b) study controls for any additional factor \* (other fracture risk factors)

#### **Exposure**

##### **1) Ascertainment of exposure**

- a) secure record (verified fracture) \*
- b) structured interview where blind to case/control status \*
- c) interview not blinded to case/control status
- d) written self report or medical record only
- e) no description

##### **2) Same method of ascertainment for cases and controls**

- a) yes \*
- b) no

1  
2  
3  
4  
5  
6  
7  
8  
9  
10  
11  
12  
13  
14  
15  
16  
17  
18  
19  
20  
21  
22  
23  
24  
25  
26  
27  
28  
29  
30  
31  
32  
33  
34  
35  
36  
37  
38  
39  
40  
41  
42  
43  
44  
45  
46  
47  
48  
49  
50  
51  
52  
53  
54  
55  
56  
57  
58  
59  
60

**3) Non-Response rate**

- a) same rate for both groups \*
- b) non respondents described
- c) rate different and no designation

For peer review only



## **SUPPLEMENTARY MATERIAL 1B**

### **NEWCASTLE - OTTAWA QUALITY ASSESSMENT SCALE - COHORT STUDIES**

Note: A study can be awarded a maximum of one star for each numbered item within the Selection and Outcome categories. A maximum of two stars can be given for Comparability

#### **Selection**

##### **1) Representativeness of the exposed cohort**

- a) truly representative of the average general population of that age in the community \*
- b) somewhat representative of the average general population of that age in the community \*
- c) selected group of users eg nurses, volunteers
- d) no description of the derivation of the cohort

##### **2) Selection of the non exposed cohort**

- a) drawn from the same community as the exposed cohort \*
- b) drawn from a different source
- c) no description of the derivation of the non exposed cohort

##### **3) Ascertainment of exposure**

- a) secure record (verified fracture) \*
- b) structured interview \*
- c) written self report
- d) no description

##### **4) Demonstration that outcome of interest was not present at start of study**

- a) yes \*
- b) no

#### **Comparability**

##### **1) Comparability of cohorts on the basis of the design or analysis**

- a) study controls for age\*
- b) study controls for any additional fracture risk factors\*

#### **Outcome**

##### **1) Assessment of outcome**

- a) independent blind assessment \*
- b) record linkage \*
- c) self report
- d) no description

1  
2  
3 **2) Was follow-up long enough for outcomes to occur**  
4

5 a) yes (fracture - 1 year) \*

6  
7 b) no

8 **3) Adequacy of follow up of cohorts**  
9

10 a) complete follow up - all subjects accounted for \*

11 b) subjects lost to follow up unlikely to introduce bias - small number lost - <20% lost to  
12 follow up, or description provided of those lost) \*

13 c) follow up rate < 80% (select an adequate %) and no description of those lost

14 d) no statement  
15  
16  
17  
18  
19  
20  
21  
22  
23  
24  
25  
26  
27  
28  
29  
30  
31  
32  
33  
34  
35  
36  
37  
38  
39  
40  
41  
42  
43  
44  
45  
46  
47  
48  
49  
50  
51  
52  
53  
54  
55  
56  
57  
58  
59  
60

## **SUPPLEMENTARY MATERIAL 1C**

### **CODING MANUAL FOR COHORT STUDIES**

#### **Selection**

##### **1) Representativeness of the Exposed Cohort**

Item is assessing the representativeness of exposed individuals in the community, not the representativeness of the sample of women from some general population. For example, subjects derived from groups likely to contain middle class, better educated, health oriented women are likely to be representative of postmenopausal estrogen users while they are not representative of all women (e.g. members of a health maintenance organisation (HMO) will be a representative sample of estrogen users. While the HMO may have an under-representation of ethnic groups, the poor, and poorly educated, these excluded groups are not the predominant users of estrogen).

#### ***Allocation of stars as per rating sheet***

##### **2) Selection of the Non-Exposed Cohort**

Allocation of stars as per rating sheet

##### **3) Ascertainment of Exposure**

Allocation of stars as per rating sheet

##### **4) Demonstration That Outcome of Interest Was Not Present at Start of Study**

In the case of mortality studies, outcome of interest is still the presence of a disease/ incident, rather than death. That is to say that a statement of no history of disease or incident earns a star.

#### **Comparability**

##### **1) Comparability of Cohorts on the Basis of the Design or Analysis**

A maximum of 2 stars can be allotted in this category

Either exposed and non-exposed individuals must be matched in the design and/or confounders must be adjusted for in the analysis. Statements of no differences between groups or that differences were not statistically significant are not sufficient for establishing comparability.

Note: If the relative risk for the exposure of interest is adjusted for the confounders listed, then the groups will be considered to be comparable on each variable used in the adjustment.

There may be multiple ratings for this item for different categories of exposure (e.g. ever vs. never, current vs. previous or never)

Age = , Other controlled factors =

## Outcome

### 1) Assessment of Outcome

For some outcomes (e.g. fractured hip), reference to the medical record is sufficient to satisfy the requirement for confirmation of the fracture. This would not be adequate for vertebral fracture outcomes where reference to x-rays would be required.

- a) Independent or blind assessment stated in the paper, or confirmation of the outcome by reference to secure records (x-rays, medical records, etc.)
- b) Record linkage (e.g. identified through ICD codes on database records)
- c) Self-report (i.e. no reference to original medical records or x-rays to confirm the outcome)
- d) No description.

### 2) Was Follow-Up Long Enough for Outcomes to Occur

An acceptable length of time should be decided before quality assessment begins (e.g. 5 yrs. for exposure to breast implants)

### 3) Adequacy of Follow-Up of Cohorts

This item assesses the follow-up of the exposed and non-exposed cohorts to ensure that losses are not related to either the exposure or the outcome.

Allocation of stars as per rating sheet.

## **SUPPLEMENTARY MATERIAL 1D**

### **NEWCASTLE - OTTAWA QUALITY ASSESSMENT SCALE – CROSS-SECTIONAL STUDIES**

#### **Selection (Maximum 5 stars)**

##### **1) Representativeness of the exposed cohort**

- a) Truly representative of the average general population of that age in the community \*  
(all subjects or random sampling)
- b) Somewhat representative of the average general population of that age in the community \*(non-random sampling)
- c) Selected group of users eg nurses, volunteers
- d) No description of the derivation of the cohort

##### **2) Sample size**

- a) Justified\*
- b) Non-justified

##### **3) Non-respondents**

- a) Comparability between respondents and non-respondents characteristics is established, and the response rate is satisfactory\*
- b) The response rate is unsatisfactory, or the comparability between respondents and non-respondents is unsatisfactory
- c) No description of the response rate or the characteristics of the responders and the non-responders

##### **4) Ascertainment of the exposure (risk factor):**

- a) Validated measurement tool \*\*
- b) Non-validated measurement tool, but the tool is available or described \*
- c) No description of the measurement tool

#### **Comparability (Maximum 2 stars)**

##### **1) The subjects in different outcome groups are comparable, based on the study design or analysis. Confounding factors are controlled**

- a) Study controls for age \*
- b) Study controls for any additional fracture risk factors \*

#### **Outcome (Maximum 3 stars)**

##### **1) Assessment of outcome**

- a) Independent blind assessment \*\*
- b) Record linkage \*\*

1  
2  
3 c) Self-report \*

4  
5 d) No description

6  
7 **2) Statistical test**

8 a) The statistical test used to describe the data is clearly described and appropriate, and  
9 the measurement of the association is presented, including confidence intervals and the  
10 probability level (p value) \*

11  
12  
13 b) The statistical test is not appropriate, not described or incomplete  
14  
15  
16  
17  
18  
19  
20  
21  
22  
23  
24  
25  
26  
27  
28  
29  
30  
31  
32  
33  
34  
35  
36  
37  
38  
39  
40  
41  
42  
43  
44  
45  
46  
47  
48  
49  
50  
51  
52  
53  
54  
55  
56  
57  
58  
59  
60

For peer review only

**PRISMA-P (Preferred Reporting Items for Systematic review and Meta-Analysis Protocols) 2015 checklist: recommended items to address in a systematic review protocol\***

| Section and topic                 | Item No | Checklist item                                                                                                                                                                                                                | Page number |
|-----------------------------------|---------|-------------------------------------------------------------------------------------------------------------------------------------------------------------------------------------------------------------------------------|-------------|
| <b>ADMINISTRATIVE INFORMATION</b> |         |                                                                                                                                                                                                                               |             |
| Title:                            |         |                                                                                                                                                                                                                               |             |
| Identification                    | 1a      | Identify the report as a protocol of a systematic review                                                                                                                                                                      | 1           |
| Update                            | 1b      | If the protocol is for an update of a previous systematic review, identify as such                                                                                                                                            | NA          |
| Registration                      | 2       | If registered, provide the name of the registry (such as PROSPERO) and registration number                                                                                                                                    | 2,6         |
| Authors:                          |         |                                                                                                                                                                                                                               |             |
| Contact                           | 3a      | Provide name, institutional affiliation, e-mail address of all protocol authors; provide physical mailing address of corresponding author                                                                                     | 1           |
| Contributions                     | 3b      | Describe contributions of protocol authors and identify the guarantor of the review                                                                                                                                           | 12          |
| Amendments                        | 4       | If the protocol represents an amendment of a previously completed or published protocol, identify as such and list changes; otherwise, state plan for documenting important protocol amendments                               | NA          |
| Support:                          |         |                                                                                                                                                                                                                               |             |
| Sources                           | 5a      | Indicate sources of financial or other support for the review                                                                                                                                                                 | 12          |
| Sponsor                           | 5b      | Provide name for the review funder and/or sponsor                                                                                                                                                                             | 12          |
| Role of sponsor or funder         | 5c      | Describe roles of funder(s), sponsor(s), and/or institution(s), if any, in developing the protocol                                                                                                                            | 12          |
| <b>INTRODUCTION</b>               |         |                                                                                                                                                                                                                               |             |
| Rationale                         | 6       | Describe the rationale for the review in the context of what is already known                                                                                                                                                 | 5           |
| Objectives                        | 7       | Provide an explicit statement of the question(s) the review will address with reference to participants, interventions, comparators, and outcomes (PICO)                                                                      | 6           |
| <b>METHODS</b>                    |         |                                                                                                                                                                                                                               |             |
| Eligibility criteria              | 8       | Specify the study characteristics (such as PICO, study design, setting, time frame) and report characteristics (such as years considered, language, publication status) to be used as criteria for eligibility for the review | 6-8         |
| Information sources               | 9       | Describe all intended information sources (such as electronic databases, contact with study authors, trial registers or other grey literature sources) with planned dates of coverage                                         | 8-9         |
| Search strategy                   | 10      | Present draft of search strategy to be used for at least one electronic database, including planned limits, such that it could be repeated                                                                                    | 16          |

1  
2  
3  
4  
5  
6  
7  
8  
9  
10  
11  
12  
13  
14  
15  
16  
17  
18  
19  
20  
21  
22  
23  
24  
25  
26  
27  
28  
29  
30  
31  
32  
33  
34  
35  
36  
37  
38  
39  
40  
41  
42  
43  
44  
45  
46  
47

|                                    |     |                                                                                                                                                                                                                                                  |       |
|------------------------------------|-----|--------------------------------------------------------------------------------------------------------------------------------------------------------------------------------------------------------------------------------------------------|-------|
| Study records:                     |     |                                                                                                                                                                                                                                                  |       |
| Data management                    | 11a | Describe the mechanism(s) that will be used to manage records and data throughout the review                                                                                                                                                     | 8     |
| Selection process                  | 11b | State the process that will be used for selecting studies (such as two independent reviewers) through each phase of the review (that is, screening, eligibility and inclusion in meta-analysis)                                                  | 8     |
| Data collection process            | 11c | Describe planned method of extracting data from reports (such as piloting forms, done independently, in duplicate), any processes for obtaining and confirming data from investigators                                                           | 9     |
| Data items                         | 12  | List and define all variables for which data will be sought (such as PICO items, funding sources), any pre-planned data assumptions and simplifications                                                                                          | 9     |
| Outcomes and prioritization        | 13  | List and define all outcomes for which data will be sought, including prioritization of main and additional outcomes, with rationale                                                                                                             | 7     |
| Risk of bias in individual studies | 14  | Describe anticipated methods for assessing risk of bias of individual studies, including whether this will be done at the outcome or study level, or both; state how this information will be used in data synthesis                             | 9     |
| Data synthesis                     | 15a | Describe criteria under which study data will be quantitatively synthesised                                                                                                                                                                      | 9-10  |
|                                    | 15b | If data are appropriate for quantitative synthesis, describe planned summary measures, methods of handling data and methods of combining data from studies, including any planned exploration of consistency (such as $I^2$ , Kendall's $\tau$ ) | 9-10  |
|                                    | 15c | Describe any proposed additional analyses (such as sensitivity or subgroup analyses, meta-regression)                                                                                                                                            | 10-11 |
|                                    | 15d | If quantitative synthesis is not appropriate, describe the type of summary planned                                                                                                                                                               | NA    |
| Meta-bias(es)                      | 16  | Specify any planned assessment of meta-bias(es) (such as publication bias across studies, selective reporting within studies)                                                                                                                    | 11    |
| Confidence in cumulative evidence  | 17  | Describe how the strength of the body of evidence will be assessed (such as GRADE)                                                                                                                                                               | 9     |

**\* It is strongly recommended that this checklist be read in conjunction with the PRISMA-P Explanation and Elaboration (cite when available) for important clarification on the items. Amendments to a review protocol should be tracked and dated. The copyright for PRISMA-P (including checklist) is held by the PRISMA-P Group and is distributed under a Creative Commons Attribution Licence 4.0.**

*From: Shamseer L, Moher D, Clarke M, Ghersi D, Liberati A, Petticrew M, Shekelle P, Stewart L, PRISMA-P Group. Preferred reporting items for systematic review and meta-analysis protocols (PRISMA-P) 2015: elaboration and explanation. BMJ. 2015 Jan 2;349(jan02 1):g7647.*
