# Supplementary material for: Abdominal aortic calcification, bone mineral density and fractures: a systematic review and meta-analysis protocol
Source: PubMed Central journal article supplement — BMJ Open. 2019 Apr 2;9(4):e026232. doi: 10.1136/bmjopen-2018-026232 (PMC6500258; doi:10.1136/bmjopen-2018-026232), 2019-04-02
Supplement: bmjopen-2018-026232supp001.pdf [file bmjopen-2018-026232supp001.pdf]

## **SUPPLEMENTARY MATERIAL 1A**

### **NEWCASTLE - OTTAWA QUALITY ASSESSMENT SCALE - CASE CONTROL STUDIES**

Note: A study can be awarded a maximum of one star for each numbered item within the Selection and Exposure categories. A maximum of two stars can be given for Comparability.

#### **Selection**

##### **1) Is the case definition adequate?**

- a) yes, with independent validation \*
- b) yes, e.g. record linkage or based on self reports
- c) no description

##### **2) Representativeness of the cases**

- a) consecutive or obviously representative series of cases \*
- b) potential for selection biases or not stated

##### **3) Selection of Controls**

- a) community controls \*
- b) hospital controls
- c) no description

##### **4) Definition of Controls**

- a) no history of disease (endpoint) \*
- b) no description of source

#### **Comparability**

##### **1) Comparability of cases and controls on the basis of the design or analysis**

- a) study controls for fracture risk factors (age) \*
- b) study controls for any additional factor \* (other fracture risk factors)

#### **Exposure**

##### **1) Ascertainment of exposure**

- a) secure record (verified fracture) \*
- b) structured interview where blind to case/control status \*
- c) interview not blinded to case/control status
- d) written self report or medical record only
- e) no description

##### **2) Same method of ascertainment for cases and controls**

- a) yes \*
- b) no

### **3) Non-Response rate**

- a) same rate for both groups \*
- b) non respondents described
- c) rate different and no designation

## **SUPPLEMENTARY MATERIAL 1B**

### **NEWCASTLE - OTTAWA QUALITY ASSESSMENT SCALE - COHORT STUDIES**

Note: A study can be awarded a maximum of one star for each numbered item within the Selection and Outcome categories. A maximum of two stars can be given for Comparability

#### **Selection**

##### **1) Representativeness of the exposed cohort**

- a) truly representative of the average general population of that age in the community \*
- b) somewhat representative of the average general population of that age in the community \*
- c) selected group of users eg nurses, volunteers
- d) no description of the derivation of the cohort

##### **2) Selection of the non exposed cohort**

- a) drawn from the same community as the exposed cohort \*
- b) drawn from a different source
- c) no description of the derivation of the non exposed cohort

##### **3) Ascertainment of exposure**

- a) secure record (verified fracture) \*
- b) structured interview \*
- c) written self report
- d) no description

##### **4) Demonstration that outcome of interest was not present at start of study**

- a) yes \*
- b) no

#### **Comparability**

##### **1) Comparability of cohorts on the basis of the design or analysis**

- a) study controls for age\*
- b) study controls for any additional fracture risk factors\*

#### **Outcome**

##### **1) Assessment of outcome**

- a) independent blind assessment \*
- b) record linkage \*
- c) self report
- d) no description

**2) Was follow-up long enough for outcomes to occur**

- a) yes (fracture - 1 year) \*
- b) no

**3) Adequacy of follow up of cohorts**

- a) complete follow up - all subjects accounted for \*
- b) subjects lost to follow up unlikely to introduce bias - small number lost - <20% lost to follow up, or description provided of those lost) \*
- c) follow up rate < 80% (select an adequate %) and no description of those lost
- d) no statement

## SUPPLEMENTARY MATERIAL 1C

### **CODING MANUAL FOR COHORT STUDIES**

#### **Selection**

##### **1) Representativeness of the Exposed Cohort**

Item is assessing the representativeness of exposed individuals in the community, not the representativeness of the sample of women from some general population. For example, subjects derived from groups likely to contain middle class, better educated, health oriented women are likely to be representative of postmenopausal estrogen users while they are not representative of all women (e.g. members of a health maintenance organisation (HMO) will be a representative sample of estrogen users. While the HMO may have an under-representation of ethnic groups, the poor, and poorly educated, these excluded groups are not the predominant users of estrogen).

#### *Allocation of stars as per rating sheet*

##### **2) Selection of the Non-Exposed Cohort**

Allocation of stars as per rating sheet

##### **3) Ascertainment of Exposure**

Allocation of stars as per rating sheet

##### **4) Demonstration That Outcome of Interest Was Not Present at Start of Study**

In the case of mortality studies, outcome of interest is still the presence of a disease/ incident, rather than death. That is to say that a statement of no history of disease or incident earns a star.

#### **Comparability**

##### **1) Comparability of Cohorts on the Basis of the Design or Analysis**

A maximum of 2 stars can be allotted in this category

Either exposed and non-exposed individuals must be matched in the design and/or confounders must be adjusted for in the analysis. Statements of no differences between groups or that differences were not statistically significant are not sufficient for establishing comparability.

Note: If the relative risk for the exposure of interest is adjusted for the confounders listed, then the groups will be considered to be comparable on each variable used in the adjustment.

There may be multiple ratings for this item for different categories of exposure (e.g. ever vs. never, current vs. previous or never)

Age = , Other controlled factors =

## **Outcome**

### **1) Assessment of Outcome**

For some outcomes (e.g. fractured hip), reference to the medical record is sufficient to satisfy the requirement for confirmation of the fracture. This would not be adequate for vertebral fracture outcomes where reference to x-rays would be required.

- a) Independent or blind assessment stated in the paper, or confirmation of the outcome by reference to secure records (x-rays, medical records, etc.)
- b) Record linkage (e.g. identified through ICD codes on database records)
- c) Self-report (i.e. no reference to original medical records or x-rays to confirm the outcome)
- d) No description.

### **2) Was Follow-Up Long Enough for Outcomes to Occur**

An acceptable length of time should be decided before quality assessment begins (e.g. 5 yrs. for exposure to breast implants)

### **3) Adequacy of Follow-Up of Cohorts**

This item assesses the follow-up of the exposed and non-exposed cohorts to ensure that losses are not related to either the exposure or the outcome.

Allocation of stars as per rating sheet.

## **SUPPLEMENTARY MATERIAL 1D**

### **NEWCASTLE - OTTAWA QUALITY ASSESSMENT SCALE – CROSS-SECTIONAL STUDIES**

#### **Selection (Maximum 5 stars)**

##### **1) Representativeness of the exposed cohort**

- a) Truly representative of the average general population of that age in the community \*  
(all subjects or random sampling)
- b) Somewhat representative of the average general population of that age in the community \*(non-random sampling)
- c) Selected group of users eg nurses, volunteers
- d) No description of the derivation of the cohort

##### **2) Sample size**

- a) Justified\*
- b) Non-justified

##### **3) Non-respondents**

- a) Comparability between respondents and non-respondents characteristics is established, and the response rate is satisfactory\*
- b) The response rate is unsatisfactory, or the comparability between respondents and non-respondents is unsatisfactory
- c) No description of the response rate or the characteristics of the responders and the non-responders

##### **4) Ascertainment of the exposure (risk factor):**

- a) Validated measurement tool \*\*
- b) Non-validated measurement tool, but the tool is available or described \*
- c) No description of the measurement tool

#### **Comparability (Maximum 2 stars)**

##### **1) The subjects in different outcome groups are comparable, based on the study design or analysis. Confounding factors are controlled**

- a) Study controls for age \*
- b) Study controls for any additional fracture risk factors \*

#### **Outcome (Maximum 3 stars)**

##### **1) Assessment of outcome**

- a) Independent blind assessment \*\*
- b) Record linkage \*\*

c) Self-report \*

d) No description

**2) Statistical test**

a) The statistical test used to describe the data is clearly described and appropriate, and the measurement of the association is presented, including confidence intervals and the probability level (p value) \*

b) The statistical test is not appropriate, not described or incomplete
